## 23 **Highlights**

- 24 • ULK1/2 interact with PXN and phosphorylate PXN at S32 and S119 in response to  
25 mechanical stimuli
- 26 • ULK1/2-mediated phosphorylation of PXN regulates mechanotransduction and migration of  
27 breast cancer cells
- 28 • ULK1/2 modulate the biomaterial properties of focal adhesions through PXN phosphorylation
- 29 • ULK1/2 and FAK/Src act antagonistically in mechanotransduction through competitive  
30 phosphorylation of PXN

31

## 32 **Abstract**

33 The remodeling and stiffening of the extracellular matrix (ECM) associated with breast cancers is a  
34 well-recognized modulator of disease progression. However, how changes in the mechanical  
35 properties of the ECM are converted into biochemical signals that direct tumor cell migration and  
36 metastasis remains poorly characterized. Here, we describe a new role for the autophagy-inducing  
37 serine/threonine kinases ULK1 and ULK2 in mechanotransduction. We demonstrate that ULK1/2  
38 activity inhibits the assembly of actin stress fibers and focal adhesions (FAs), and as a consequence  
39 impedes cell contraction and migration. Mechanistically, we identify PXN/paxillin, a key component of  
40 the mechanotransducing machinery, as a direct binding partner and substrate of ULK1/2. ULK-  
41 mediated phosphorylation of PXN at S32 and S119 weakens homotypic interactions and liquid-liquid  
42 phase separation of PXN, impairing FA assembly, which in turn impedes the mechanotransduction of  
43 breast cancer cells. ULK1/2 and the well characterized PXN regulator, FAK/Src, have opposing  
44 functions on mechanotransduction and compete for phosphorylation of adjacent serine and tyrosine  
45 residues. Thus, our study reveals ULK1/2 as important regulators of PXN-dependent  
46 mechanotransduction.

## 47 **Introduction**

48 The extracellular matrix (ECM) continuously modulates various aspects of cellular behavior,  
49 including division, growth, migration, and death. Cells sense changes in the biochemical composition  
50 or mechanical properties of the ECM through focal adhesions (FAs), which are dynamic protein  
51 assemblies involved in mechanotransduction. Upon engagement with the ECM, transmembrane  
52 heterodimeric integrin receptors recruit numerous FA-associated components, which in turn connect  
53 with the actin cytoskeletal network. In response to increasing stiffness, cells actively strengthen  
54 opposing contractile and tension forces through actin polymerization and actomyosin motors. In this  
55 manner, mechanical cues are converted into biochemical outputs, which include extensive post-  
56 translational modifications and changes in protein-protein interactions.

57 Tumor-associated breast tissues exhibit augmented rigidity compared to normal mammary  
58 tissues. Indeed, palpation is used as an initial diagnostic method for breast tumors due to their  
59 prominently rigid nature. It is now widely appreciated that stiffened ECM instructs invasion of breast  
60 cancer cells (Levental et al., 2009; Riehl et al., 2020). However, the molecular mechanisms through  
61 which breast cancer cells sense and transduce these mechanical signals into biological activities  
62 remain less well understood.

63 Most steps in mechanotransduction pathways are energy consuming, requiring  
64 approximately 50% of total cellular ATP (Bernstein and Bamburg, 2003). Therefore, these pathways  
65 are likely to engage in crosstalk with metabolic programs (Romani et al., 2021; Salvi and DeMali,  
66 2018). In principle, metabolism can impinge on mechanotransduction in two distinct manners. First,  
67 energy-producing catabolism can fuel processes such as actin polymerization. Alternatively, certain  
68 metabolites can directly modulate cellular processes that are essential for mechanotransduction.  
69 Preliminary evidence suggests that mechanotransduction and metabolism can be coupled. For  
70 instance, the metabolic sensor AMPK is activated in response to mechanical stimuli and stimulates  
71 both ATP production and glucose transport (Bays et al., 2017), which may in turn reinforce cell  
72 adhesions and the actin cytoskeletal network. However, whether AMPK-mediated glucose transport  
73 and ATP production or other targets of AMPK, such as ULK1/2, are responsible for the enhanced  
74 cell-cell contact remains unclear.

75 ULK1/2 are functionally redundant serine/threonine kinases that regulate multiple steps of  
76 the autophagy pathway, which targets superfluous or damaged proteins and organelles for  
77 lysosomal degradation and recycling to maintain cellular energy homeostasis (Dikic and Elazar,  
78 2018; Wang and Kundu, 2017; Zachari and Ganley, 2017). Phosphorylation of ULK1/2 by AMPK  
79 increases flux through the autophagy pathway (Kim et al., 2011). The inhibition of ULK1-dependent

80 autophagic function under hypoxic conditions has been associated with increased invasion and  
81 migration of breast cancer cell lines *in vitro* and in xenograft models (Dower et al., 2017), and  
82 although autophagy has been shown to promote FA disassembly and cell motility (Bressan et al.,  
83 2020; Kenific et al., 2016; Sharifi et al., 2016), the role of ULK1/2 in mechanotransduction has not  
84 been explored. Indeed, the links between mechanotransduction and autophagy remain controversial.  
85 Whereas autophagy activity is enhanced via nuclear-localized YAP/TAZ induced by high ECM  
86 stiffness (Totaro et al., 2019), autophagy can also be increased in cells grown on soft matrix (Vera-  
87 Ramirez et al., 2018). These observations highlight a context-dependent relationship between these  
88 two pathways. Not surprisingly, autophagy can be anti- or pro-tumorigenic depending on the tumor  
89 stage and context (Niklaus et al., 2021).

90 In examining the relationship between autophagy and mechanotransduction, we made the  
91 unexpected discovery that ULK1 and ULK2 negatively regulate mechanotransduction in breast  
92 cancer cells. Specifically, we demonstrate that ULK1/2 interact directly with the FA scaffold protein  
93 PXN/paxillin, and phosphorylate PXN at S32 and S119 in a mechanosensitive manner.  
94 Phosphorylation of PXN by ULK1 weakens homotypic interactions, thereby reducing PXN's ability to  
95 drive the assembly of FA condensates *in vitro*, and decelerating the kinetics of FA assembly in cells,  
96 thus compromising mechanotransduction and migration. These observations may help to explain  
97 why decreased expression of ULK1 in breast cancer samples is associated with a worse prognosis.

98

## 99 **Results**

### 100 *ULK1/2 negatively regulate mechanics of breast cancer cells in an autophagy-independent manner*

101 In order to begin exploring the relationship between the ECM, mechanotransduction and autophagy,  
102 we collected 6 samples from breast cancer patients along with paired adjacent normal tissues and  
103 performed immunoblot analyses. Consistent with previous report (Levental et al., 2009), we  
104 observed increased levels of certain ECM proteins, including collagen and fibronectin, in the tumor  
105 samples compared to normal tissues (Fig. 1A-1B). Consistent with the results of our sc-RNAseq  
106 analyses, tumor samples also showed increased levels of several markers of cellular contraction and  
107 integrin signaling, such as  $\alpha$ -smooth muscle actin ( $\alpha$ -SMA), focal adhesion kinase (FAK)  
108 phosphorylated at Y397, and PXN phosphorylated at Y118 (Fig. 1A-1B). We found no detectable  
109 change in the protein levels of several key markers (ATG13, FIP200/RB1CC1, p62, and LC3II) of  
110 autophagic activity, except ULK1, whose levels were decreased (Fig. S1A-1B).



111 Due to the well-known cellular complexity of tissues infiltrated by breast cancer, and  
112 heterogeneity of breast cancer cells, we sought to identify consistent cell intrinsic differences  
113 between normal and malignant breast epithelial cells. Towards this end, we used a publicly available  
114 single-cell RNA sequencing (sc-RNAseq) dataset to compare gene expression profiles from normal  
115 and malignant mammary epithelial cells after computationally separating them from other cell types  
116 in the heterogeneous tissue samples (Pal et al., 2021). Gene ontology (GO) enrichment revealed  
117 111 significantly altered cellular processes. Among the top 15 most significant hits, we found  
118 prominent enrichment of mitochondria and ribosome-related activities (Fig. 1C), both of which are  
119 frequently associated with breast cancers (Ebright et al., 2020; Li and Li, 2021). Interestingly, the top  
120 GO terms also included FA and cell substrate junction, both of which are directly relevant to cellular  
121 mechanosensing and transduction (Fig. 1C). We next performed gene set enrichment analysis  
122 (GSEA), which revealed that genes related to cell substrate junction, contractile fiber, cell cortex, and  
123 actin cytoskeleton were significantly upregulated in the malignant mammary epithelial cells (Fig. 1D).  
124 These data highlight the aberrant activation of the mechanotransduction pathway in breast cancer  
125 cells compared to normal mammary epithelium. Notably, the abundance of important autophagy-  
126 associated genes remained unchanged between normal and malignant cells (Fig. S1C).

127 The reduced levels of ULK1 in cancerous breast tissues drew our attention because ULK1  
128 expression has been reported as an independent prognostic factor in breast cancer (Tang et al.,  
129 2012). Using the TCGA database, we independently confirmed the association between the  
130 expression of ULK1 and ULK2 and breast cancer prognosis [i.e., decreased *ULK1* and *ULK2* mRNA  
131 levels were associated with a significantly ( $p = 8.9 \times 10^{-07}$  and 0.0098 for *ULK1* and *ULK2*,  
132 respectively) worse prognosis] (Fig. 1E).

133 To test the effect on ULK1 expression on cell migration, we used a chemoattractant-based  
134 transwell assay in which cells are cultured in the upper compartment and allowed to migrate through  
135 a microporous membrane into the lower compartment, where chemotactic agents are present. Since  
136 highly metastatic breast cancer cells such as MDA-MB-231 exhibit relatively low levels of ULK1  
137 expression compared to those that are less metastatic (Mao et al., 2020), we chose to inducibly  
138 express ULK1 wildtype (WT), ULK1 kinase dead (KD, K46A), ULK2 WT, or ULK2 KD (K39T) in these  
139 cells. The steady state levels of ULK1 (WT and KD) were higher than that of ULK2 (WT or KD) in the  
140 stable cell lines (Fig. S1D). Overexpression of ULK1 WT, but not ULK1 KD, strongly impeded cell  
141 migration in this assay (Fig. 1F-1G) without any appreciable impact on cell proliferation (Fig. S1E).  
142 We also generated *ULK1* null HeLa cells, reconstituted them with ULK1 WT or ULK1 KD (Fig. S1F),  
143 and assessed the migratory potentials of these cells using the transwell assay. Again, ULK1 WT, but  
144 not ULK1 KD, inhibited cell migration in these cells (Fig. S1G-1H), suggesting that this function of

145 ULK1 in tumor cell migration is likely not cell type-specific. Silencing either *ULK1* or *ULK2* markedly  
146 increased migration of HeLa cells (Fig. S1I-1J), highlighting their functional redundancy.

147 To test whether this inhibitory effect of ULK1/2 in cell migration is related to its effects on  
148 autophagy, we chose to knock down expression of several key autophagy genes, including *ATG13*,  
149 *FIP200/RB1CC1*, *ATG7*, and *ATG14*, and assess the subsequent impact on cell migration (Fig.  
150 S1K). Among these, *ATG13* and *FIP200* form complexes with ULK1/2, *ATG7* is required for most  
151 known forms of autophagy, and *ATG14* is a substrate of ULK1/2 during autophagy initiation (Dikic  
152 and Elazar, 2018; Park et al., 2018). Knockdown of *ATG13*, *ATG7*, or *ATG14* did not significantly  
153 alter cell migration, whereas knockdown of *FIP200* significantly increased cell migration (Fig. S1L-  
154 1M). Although recent studies have focused on *FIP200*'s role in autophagy, *FIP200* was initially  
155 identified as a direct interactor and regulator of the FA components FAK and Pyk2 (Ueda et al.,  
156 2000). Indeed, *FIP200*'s regulation of cell motility and focal adhesion stability is independent of its  
157 role in autophagy (Abbi et al., 2002; Assar and Tumbarello, 2020). Taken together, these results  
158 suggest that ULK1/2 negatively regulate breast cancer cell migration in an autophagy-independent  
159 manner.

160 Because MDA-MB-231 cells are known for extreme morphological and mechanical  
161 heterogeneity (Shen et al., 2020), for subsequent studies we used HeLa cells for morphological  
162 analyses and performed critical functional assays (e.g., transwell) using MDA-MB-231 cells to test  
163 the applicability of our findings in breast cancer cells.

164 Given our finding of the negative correlation between integrin signaling and ULK1 protein  
165 levels in patient cells, we hypothesized that ULK1's inhibition of cell migration may at least in part be  
166 related to an inhibitory effect on integrin activation. To test this concept, we next examined signaling  
167 proteins downstream of integrin activation in response to manipulation of ULK1 expression or  
168 activity. Indeed, overexpression of ULK1 WT was associated with decreased abundance of signaling  
169 proteins downstream of integrin activation, including FAK phosphorylated at Y397 and Y925 as well  
170 as PXN at Y31 and Y118 (Fig. 1H, and S1N). We next asked if the overall activity of integrin  
171 receptors was altered by ULK1. We took advantage of a well-characterized antibody (12G10) that  
172 specifically recognizes the activated integrin  $\beta$ 1 receptor. Indeed, depleting ULK1 led to significantly  
173 increased intensities of activated integrin  $\beta$ 1 receptor and re-introducing the kinase-active ULK1  
174 attenuated the intensities (Fig. 1I-1J). Because integrin signaling is tightly associated with cell  
175 contraction, we performed a 3D collagen contraction assay, which measures the cellular contractile  
176 forces towards the matrix, to assess the role of ULK1 in this process. Depleting ULK1 significantly  
177 diminished cellular contractile forces, which was reversed by reconstituting kinase active ULK1 (Fig.  
178 1K-1L). Again, this function of ULK1 was unrelated to autophagy since knockdown of other

179 representative autophagy proteins did not have similar effects (S1O-1P). We next employed  
180 quantitative traction force microscopy (TFM) to evaluate the average cellular contractile force, which  
181 was reduced from 200 Pa in *ULK1*<sup>-/-</sup> cells to less than 100 Pa by the expression of functional ULK1  
182 (Fig. 1M-1N). Collectively, these results suggest that ULK1 is a negative regulator of cell contraction  
183 and migration.

#### 184 *ULK1/2 suppress stiffness-dependent cell spreading, actin reinforcement and FA assembly*

185 Based on the findings described above, we hypothesize that ULK1/2 govern cellular  
186 response to mechanical changes of the ECM. To mimic the fluctuating mechanical stimulation of the  
187 ECM, we fabricated polyacrylamide (PA) gels with various stiffness ranging from 2.7 kPa (soft) to  
188 glass (stiff) and used these as substrates for HeLa cell growth. We then collected lysates from these  
189 cells and examined markers of cell contraction and integrin signaling by immunoblot. As expected,  
190 we found upregulation of  $\alpha$ -SMA, phosphorylated myosin light chain 2 (MLC2), FAK, and PXN with  
191 increasing stiffness of the substrate (Fig. 2A-2B). We also examined metabolic proteins to  
192 investigate potential association between mechanotransduction and metabolism. Among proteins we  
193 examined, AMPK was significantly activated with increasing substrate stiffness (Fig. 2A-2B),  
194 consistent with the idea that AMPK safeguards the energetic needs for resisting increases in  
195 substrate stiffness (Bays et al., 2017). mTOR activity was also markedly augmented by higher  
196 substrate stiffness, in line with the idea high substrate stiffness promotes cell growth (Fig. 2A-2B). In  
197 contrast to prior studies showing changes in autophagic activity in response to increases in substrate  
198 stiffness (Totaro et al., 2019; Vera-Ramirez et al., 2018), we found that autophagy flux remained  
199 stable, as indicated by unchanged levels of p62, LC3II, and phosphorylated ATG14 protein (Fig. 2A-  
200 2B). Morphologically, cells expressing ULK1 WT showed significantly shrunken size and disrupted  
201 actin remodeling compared to those expressing no ULK1 or KD ULK1 (Fig. 2C-E, and S2A),  
202 suggesting that ULK1 negatively governs cellular mechanics in a kinase-dependent manner.  
203 Knockdown of *ATG13*, *FIP200/RB1CC1*, *ATG7*, or *ATG14* had no appreciable effects on cell  
204 spreading and actin structure, whereas knockdown of *ULK1* resulted in over-spreading and actin  
205 super-assembly (Fig. S2B-D), implying that ULK1 participate in mechanotransduction pathways  
206 independent of autophagy. We found similar effects of ULK2 (i.e., *ULK2*<sup>-/-</sup> cells with re-expression of  
207 ULK2 WT and KD) in regulating cell size and actin structure (Fig. 2F-2G, and S2E). Live cell imaging  
208 revealed that ULK1-expressing cells showed delays in cell spreading on glass (Fig. S2F-2G). This  
209 phenomenon was independently validated by silencing ULK1 and ULK2 using shRNAs (Fig. S2H).  
210 For cells growing on glass, the decreased actomyosin contraction due to ULK1 expression was  
211 accompanied by lower cellular stiffness measured by atomic force microscopy (AFM) (Fig. 2H).

212 Together, our data implicate an intriguing role of ULK1/2 in negatively regulating actin assembly,  
213 leading to reductions in cell stiffness, contractile forces and adaptability to mechanical inputs.

214 FAs are dynamic transmembrane macromolecular assemblies serving as a major node to  
215 translate mechanical stimuli to biological signal and dictate downstream cellular behavior, including  
216 cell migration, differentiation, and division (Parsons et al., 2010). Based on our findings that ULK1/2  
217 negatively regulate cell mechanotransduction, we next tested the hypothesis that ULK1/2 influence  
218 the dynamics of FAs. Consistent with this hypothesis, stiffer substrates significantly increased the  
219 formation of FAs, which was markedly attenuated by expression of ULK1 WT but not ULK1 KD (Fig.  
220 2I-2J). We next treated cells expressing different ULK variants grown on glass with the myosin  
221 inhibitor blebbistatin and allowed the cells to recover while we monitored the assembly/maturation of  
222 FAs. We found that ULK1 significantly hindered FA assembly/maturation (Fig. 2K-2L). In contrast,  
223 knockdown of *ATG13*, *FIP200/RB1CC1*, *ATG7*, or *ATG14* resulted in relatively modest changes in  
224 FA morphology as compared to *ULK1* knockdown (Fig. S2I-S2K). Based on these results, we  
225 propose that ULK1/2 suppress stiffness-dependent cell spreading, actin reinforcement, and FA  
226 assembly via autophagy-independent mechanisms.

#### 227 *ULK1/2 interact with and phosphorylate PXN directly both in vitro and in cells*

228 To pursue the molecular mechanism by which ULK1/2 has these effects, we first examined PXN, a  
229 well-studied adaptor protein within FAs that has been shown to genetically interact with ULK1/2 in  
230 *Drosophila* (Chen et al., 2008). PXN is a highly conserved protein that harbors 5 LD domains in its N  
231 terminus and 4 LIM domains in its C terminus. Both the N and C termini mediate protein-protein  
232 interactions that are implicated in FA dynamics and mechanotransduction (Deakin and Turner, 2008).

233 We began by testing interactions between ULK1/2 and PXN by immunoprecipitation in  
234 HEK293T cells. We found that exogenously expressed PXN co-immunoprecipitated with ULK1/2  
235 (Fig. 3A). Recombinant PXN also pulled down with ULK1/2 immunopurified from HEK293T cells,  
236 suggesting direct interactions (Fig. 3B). We next generated a series of tagged ULK1 and PXN  
237 truncation mutants and expressed these proteins in HEK293T cells (Fig. 3C). We found that ULK1/2  
238 co-immunoprecipitated with the LIM4 domain located within the C terminus of PXN (Fig. 3D-3E, and  
239 Fig. S3A), and that full-length PXN co-immunoprecipitated with the C terminus of ULK1 (Fig. 3F).  
240 These results prompted us to examine whether ULK1/2 were also present in FAs along with PXN.  
241 Indeed, both ULK1 and ULK2 colocalized with PXN in the FAs in HeLa cells (Fig. 3G-3H).

242 We also examined interactions between ULK1/2 and HIC5, a close paralogue of PXN  
243 sharing extensive sequence and structural similarities (Alpha et al., 2020; Deakin and Turner, 2008).

244 Both redundant and non-redundant functions have been reported for PXN and HIC5 (Alpha et al.,  
245 2020; Deakin and Turner, 2008). Not surprisingly, HIC5 also interacted with ULK1 and ULK2 in a  
246 fashion akin to PXN (Fig. S3B-S3C), and C-terminal regions of HIC5 and ULK1 were responsible for  
247 these interactions (Fig. S3D-S3E). Given the homology and functional redundancy between PXN  
248 and HIC5, we focused our subsequent studies on PXN.

249 Proteins interacting with ULK1/2 are often direct substrates of these kinases (Wang and  
250 Kundu, 2017). We took advantage of a previously described p(S/T)Phe antibody that recognizes  
251 phosphorylated serine/threonine residues with tyrosine, tryptophan, or phenylalanine at the -1  
252 position or phenylalanine at the +1 position. When phosphorylated, the target serine/threonine sites  
253 of many substrates of ULK1/2 can be detected by this antibody (Joo et al., 2016; Russell et al.,  
254 2013). We transiently co-expressed PXN with ULK1, ULK2, and their KD mutants in HEK293T cells  
255 and found that PXN was phosphorylated by both ULK1 and ULK2 in a kinase-dependent manner  
256 (Fig. 3I). Human PXN harbors 8 serine/threonine sites that when phosphorylated, can be detected  
257 by the p(S/T)Phe antibody. To determine which of these sites were targets of ULK1/2  
258 phosphorylation, we performed site-directed mutagenesis to substitute each of these residues with  
259 alanines (S32A, S89/90/91A, S119A, S164A, S382A, T475A, S481A, T540A). We found that that  
260 alanine substitutions at S32 and S119 dramatically diminished ULK1-mediated phosphorylation of  
261 PXN in HEK293T cells (Fig. S3F). As expected, a 2SA (S32A, S119A) PXN mutation was sufficient  
262 to abolish the phosphorylation (Fig. 3J). We next performed *in vitro* kinase assays, finding that  
263 ULK1/2-mediated phosphorylation of PXN at S32 and S119 was direct (Fig. 3K-3L). We attempted to  
264 generate antibodies raised against phospho-peptides containing S32 and S119, respectively, but did  
265 not succeed (data not shown). Therefore, we continued to utilize the p(S/T)Phe antibody to  
266 characterize PXN phosphorylation by ULK1/2. Mechanical stimulation with increasing substrate  
267 stiffness elicited striking upregulation of PXN phosphorylation (Fig. 3M), which was attenuated by a  
268 selective ULK inhibitor, SBI-0206965 (Fig. 3N-3O). Furthermore, the PXN 2SA mutant was refractory  
269 to mechanical stimuli-induced phosphorylation (Fig. 3M-3O). When cells growing on still glass were  
270 treated with myosin inhibitor blebbistatin, PXN phosphorylation was dramatically reduced (S3G-  
271 S3H). Conversely, when cells growing on relatively soft substrate (60 kPa) were stimulated with  
272 RhoA activator (Rho activator II), PXN phosphorylation was markedly enhanced. Collectively, our  
273 data demonstrate that ULK1/2 directly phosphorylate PXN at S32 and S119 *in vitro* and likely in  
274 cellular mechanotransduction as well.

### 275 *ULK1/2-mediated phosphorylation of PXN gate-keeps cellular mechanotransduction*

276 To determine the functional impact of ULK-mediated phosphorylation of PXN, we stably expressed  
277 EV (empty vector), PXN WT, the phospho-defective 2SA, or a phospho-mimetic 2SD and assessed

278 their ability to restore the aberrant migration and mechanotransduction of PXN null cells. In MDA-  
279 MB-231 cells, PXN WT efficiently rescued the compromised migration of *PXN*<sup>-/-</sup> cells, whereas  
280 expression of PXN 2SD failed to do so (Fig. 4A-4B). Such inhibitory effects of PXN phosphorylation  
281 on cell migration were similarly observed in HeLa cells (Fig. S4A-S4B). More importantly, the PXN  
282 2SD mutant was capable of restraining cell migration even in cells depleted of ULK1 by shRNA (Fig.  
283 S4C-S4D), suggesting that PXN functions downstream of ULK1 in this pathway.

284 We next asked if PXN phosphorylation by ULK1/2 affect breast cancer cell metastasis *in*  
285 *vivo*. We injected PXN-reconstituted *PXN*<sup>-/-</sup> MDA-MB-231 cells, which also stably expressed  
286 luciferase, into nude mice through their tail vein. Bioluminescence imaging using luciferase showed  
287 that compared to WT PXN, cells harboring the PXN 2SA mutant metastasized much more  
288 extensively to the lung, whereas the 2SD mutant decreased lung metastases (Fig. 4C-4D). These  
289 results suggest that ULK1/2-dependent phosphorylation of PXN restrains breast cancer metastasis.

290 To test the consequences of PXN phosphorylation in mechanotransduction, we used *PXN*<sup>-/-</sup>  
291 HeLa cells, which exhibited severely compromised ability to spread, rearrange their F-actin  
292 cytoskeletal network, and assemble FAs on substrates of high stiffness. WT PXN potently rescued  
293 these defects of *PXN*<sup>-/-</sup> cells. In contrast, expression of 2SA PXN caused the cells to over-spread,  
294 arrange a more elaborate actin network, and assemble more FAs, (Fig. 4E-4H and S4E-4F). Next,  
295 we sought to investigate if PXN phosphorylation alters actin assembly dynamics. We used  
296 cytochalasin D to disrupt intracellular actin polymerization and then removed the inhibitor to permit  
297 actin growth over time. This experiment showed that F-actin polymerized more quickly in cells  
298 expressing the 2SA mutant than those with either WT or 2SD PXN (Fig. S4G-S4H). This observation  
299 suggests that ULK1/2 limits cell spreading and actin remodeling through phosphorylating PXN in  
300 response to mechanical inputs. The activity of Rho GTPases family, including RhoA and Rac1, is  
301 tightly associated with cell mechanotransduction (Lawson and Burridge, 2014; Ohashi et al., 2017).  
302 For instance, RhoA promotes the formation of actin stress fibers and the production of contractile  
303 forces and Rac1 facilitates FA maturation (Lawson and Burridge, 2014; Ohashi et al., 2017).  
304 Therefore, we reasoned that PXN phosphorylation alters the overall cellular activity of RhoA and  
305 Rac1. We performed GST pull-down assay with GST-RTNK and GST-PAK1, which specifically bind  
306 to activated RhoA and Rac1, respectively. Interestingly, *PXN*<sup>-/-</sup> cells showed low levels of active  
307 RhoA and Rac1, which were greatly increased by reconstituting WT PXN. Expression of PXN 2SA  
308 resulted in much higher degree of RhoA and Rac1 activation (Fig. S4I-4J), entirely consistent with  
309 the enhanced mechanotransduction of these cells. Furthermore, we used AFM to measure the  
310 impact of PXN phosphorylation on cellular stiffness. Depleting PXN substantially softened the cells,  
311 which were markedly reversed by reintroducing WT PXN (Fig. 4I). Cells expressing phospho-



312 defective 2SA PXN were much stiffer compared to those expression WT or 2SD PXN (Fig. 4I) and  
313 exerted significantly augmented contractile forces towards the matrix, as evidenced by both 3D  
314 collagen contraction assay (Fig. 4J-4K) and TFM (Fig. 4L-4M). Taken together, these results suggest  
315 that phosphorylation of PXN by ULK1/2 suppresses cell mechanics, dysfunction of which facilitates  
316 breast cancer metastasis.

### 317 *Phosphorylation of PXN by ULK1/2 alters its biophysical properties*

318 FAs are the major cellular structure responsible for mechanosensing and mechanotransduction. The  
319 intracellular portion of FAs consists of hundreds of proteins and exhibits liquid-like properties (Horton  
320 et al., 2015; Kuo et al., 2011). Intriguingly, several recent investigations have reported a role for  
321 liquid-liquid phase separation (LLPS) in governing FA dynamics (Case et al., 2022; Li et al., 2020;  
322 Wang et al., 2021; Zhu et al., 2020). Consistent with these reports, our unpublished data suggest  
323 that PXN undergoes LLPS to promote the macromolecular assembly of the cytosolic FA complex  
324 (Wang et al., 2022). Given these findings, we hypothesized that ULK1/2-mediated phosphorylation of  
325 PXN might influence PXN LLPS, and therefore FA dynamics, cancer cell mechanics, and metastasis.  
326 To test this hypothesis, we first purified recombinant PXN WT, 2SA, and 2SD from *E. coli* (Fig. S5A)  
327 and assessed the behavior of these proteins in vitro. PXN WT began forming micro-sized droplets at  
328 a concentration of 6.25  $\mu\text{M}$  in physiologically relevant buffer (150 mM NaCl, pH 7.0) without any  
329 molecular crowder (Fig. 5A). The threshold concentration required for LLPS was slightly higher for  
330 PXN 2SA ( $\sim 10 \mu\text{M}$ ) and dramatically higher for PXN 2SD ( $> 25 \mu\text{M}$ ) (Fig. 5A-5B), suggesting an  
331 inhibitory effect of PXN phosphorylation on PXN LLPS.

332 We next sought to determine whether a similar phenomenon occurs in cells by using an  
333 optogenetic tool wherein intrinsically disordered regions (IDRs) of target proteins are fused with Cry2  
334 (Shin et al., 2017). In this system, Cry2 oligomerizes upon blue light illumination, serving as the initial  
335 nucleation event to trigger intracellular LLPS (Shin et al., 2017). Because the N terminus of PXN was  
336 predicted to be largely disordered (data not shown), we expressed this fragment fused with Cry2-  
337 mCherry (PXN-Cry2) as well as mCherry-Cry2 alone (Control-Cry2) (Fig. 5C). Whereas *PXN*<sup>-/-</sup> HeLa  
338 cells stably expressing Control-Cry2 remain unresponsive to brief blue light exposure (2 mins), more  
339 than 90% of cells expressing PXN-Cry2 WT rapidly formed numerous cytoplasmic condensates  
340 upon blue light exposure (Fig. 5D-5E). Similar results were obtained with cells expressing PXN-Cry2  
341 2SA (Fig. 5D-5E). Strikingly, cells expressing PXN-Cry2 2SD were almost refractory to blue light  
342 stimulation (Fig. 5D-5E), indicating diminished light-induced PXN LLPS due to PXN phosphorylation.

343 We next performed fluorescence recovery after photobleaching (FRAP) to assess the  
344 molecular dynamism of PXN mutants in cells. All the GFP-PXN fusion protein, including WT, 2SA,

345 and 2SD, localized to the FAs. When we photobleached the GFP-PXN within the FAs, the recovery  
346 rate was significantly faster for PXN 2SA and significantly slower for PXN 2SD, compared to GFP-  
347 PXN WT, (Fig. 5F-5G), indicating weaker physical interactions between the 2SD mutant with the FA  
348 constituents.

349         Given that high order homotypic oligomerization often promotes protein LLPS (Zhang et al.,  
350 2020), we sought to determine if PXN forms oligomers and if so, is it affected by phosphorylation?  
351 Using *in vitro* cross-linking with bis-sulfosuccinimidyl suberate (BS<sup>3</sup>), we found that purified PXN WT  
352 was capable of forming dimers. This ability was prominently diminished for the PXN 2SD mutant  
353 (Fig. S5B). We further took advantage of dynamic light scattering to evaluate the oligomeric status of  
354 recombinant WT and 2SD PXN proteins. PXN monomer was predicted to be 60.9 kDa, and the  
355 molecular weight of PXN WT in aqueous solution was determined to be 111.0 kDa, suggesting that  
356 the majority of PXN WT likely exists as dimers under our experimental condition (Fig. 5H). In  
357 contrast, the molecular weight of PXN 2SD was decreased to 89.0 kDa, suggesting a decreased  
358 proportion of PXN 2SD dimers in the solution (Fig. 5H). Consistent with this observation, we found  
359 that PXN 2SD was less likely to initiate self-interaction in cells as shown by immunoprecipitation  
360 (Fig. S5C). Taken together, we propose that phosphorylation of PXN by ULK1/2 weakens homotypic  
361 interactions, decelerates molecular thermodynamics, and therefore increases the threshold for  
362 LLPS, which subsequently leads to impeded FA assembly/maturation.

### 363 *ULK1/2 and FAK act antagonistically to regulate cell mechanotransduction*

364         Notably, the serine phosphorylation sites of PXN mediated by ULK1/2 (S32 and S119) are  
365 adjacent to the tyrosine phosphorylation sites mediated by FAK/Src (Y31 and Y118) (Brown and  
366 Turner, 2004). All of these residues are evolutionarily conserved in vertebrates (Fig. S6A),  
367 suggesting their functional importance. Given the opposing trends of ULK1/2 and FAK/Src  
368 expression in breast cancer tissues (Fig. 1A, and Fig. S1A), we hypothesized that these two sets of  
369 kinases might have an antagonistic regulatory relationship in mechanotransduction. To test this  
370 hypothesis, we generated PXN mutants with altered FAK/Src phosphorylation sites, either alone or  
371 in combination with mutated ULK1/2 phosphorylation sites. Thus, we generated forms of PXN that  
372 were phospho-defective (PXN 2YF), phospho-mimetic (PXN 2YE), quadruple phospho-defective  
373 (PXN 2YF/2SA), or quadruple phospho-mimetic (PXN 2YE/2SD), and then reconstituted *PXN*<sup>-/-</sup> cells  
374 with these proteins (Fig. S6B). As expected, PXN WT rescued the aberrant cell spreading, disrupted  
375 actin stress fibers, and defective FA assembly/maturation of the *PXN*<sup>-/-</sup> cells. Whereas expression of  
376 PXN 2YF yielded phenotypes indistinguishable from those associated with PXN WT, expression of  
377 PXN 2YE resulted in even greater cell spreading, longer F-actin length, and greater FA assembly  
378 than did expression of PXN WT (Fig. 6A-6D), suggesting a positive role for FAK/Src-mediated



379 phosphorylation of PXN in cell mechanotransduction. Importantly, the impact of PXN phosphorylation  
380 at Y31 and Y118 on cellular morphology and FA assembly/maturation was reversed by PXN  
381 phosphorylation at S32 and S119 (Fig. 6A-6D). Compared to WT PXN, PXN 2YF expression  
382 resulted in a small but consistent decrease in cell contraction in the 3D collagen contraction assay. This  
383 compromised cell contractility due to defective FAK phosphorylation was dramatically rescued by the  
384 quadruple phospho-defective (2YF/2SA) PXN mutant (Fig. 6E-6F), indicating functional antagonism  
385 of serine and tyrosine phosphorylation of PXN in cell contraction.

386 We next performed biochemical studies to investigate the apparent antagonism between  
387 ULK1/2 and FAK/Src. In *in vitro* kinase assays, pre-incubation of PXN with ULK1/2 WT, but not  
388 ULK1/2 KD, dramatically inhibited PXN phosphorylation by FAK *in vitro* (Fig. 6G), consistent with our  
389 observation that PXN 2SD showed lower levels of phosphorylation by FAK and Src compared with  
390 PXN WT (Fig. 6H, S6C). Conversely, pre-incubation of PXN with FAK markedly reduced PXN  
391 phosphorylation by ULK1/2 (Fig. 6I), and the PXN 2YE mutant showed decreased levels of  
392 phosphorylation by ULK1/2 (Fig. 6J). These data demonstrate that ULK1/2 and FAK/Src  
393 competitively phosphorylate PXN.

394 We further noted that while the PXN 2SD mutant showed decreased interaction with FAK  
395 and Src (Fig. 6K-6L), PXN 2YE exhibited enhanced binding to FAK and Src (Fig. 6M-6N, and S6D-  
396 S6G). This altered binding affinity of PXN 2YE was specific for FAK, as we detected no changes in  
397 binding to other interacting partners, such as Vinculin and Kindlin-2, in the PXN phospho-mutants  
398 compared with PXN WT (Fig. S6H-S6K). We next examined the binding partners of PXN 2SA and  
399 2SA by co-immunoprecipitation in cells. We found that PXN 2SA displayed stronger association with  
400 several binding partners, including HIC-5, FAK, Src, GIT-1, and kindlin-2, whereas PXN 2SD showed  
401 little interaction with these proteins (Fig. 6O). Therefore, we propose that PXN phosphorylation by  
402 ULK1/2 disfavors heterotypic interactions between FAK/Src and PXN, and subsequently inhibits  
403 PXN tyrosine phosphorylation. This PXN-centric signaling node functions as a dynamic modulator of  
404 mechanotransduction, which is linked to the metastatic potential of breast cancer cells.

405

## 406 **Discussion**

407 Here, we demonstrate that independent of autophagy regulation, ULK1/2 negatively govern breast  
408 cancer cell mechanotransduction and migration through phosphorylating PXN. Phosphorylation of  
409 PXN by ULK1/2 weakens homotypic interactions, decelerates molecular thermodynamics, and

410 therefore increases the threshold for LLPS, which subsequently leads to impeded FA  
411 assembly/maturation and aberrant mechanotransduction.

412 Our demonstration of ULK1/2 in autophagy-independent mechanotransduction adds to their  
413 expanding non-canonical functional spectrum (Joo et al., 2016; Wang et al., 2018; Wang and Kundu,  
414 2017; Wang et al., 2019). Although ULK1/2-mediated phosphorylation of PXN in  
415 mechanotransduction appears to be unrelated to autophagy under nutrient-rich culture conditions, it  
416 does not exclude the possibility that ULK1/2 may regulate autophagy flux through PXN  
417 phosphorylation. Indeed, PXN has been implicated in autophagy regulation in several independent  
418 studies (Chen et al., 2008; Lv et al., 2022; Sharifi et al., 2016). ULK1/2 may redirect cellular  
419 resources to autophagy-related pathways in response to metabolic stress (Wang and Kundu, 2017)  
420 and we therefore speculate that such a rewiring mechanism may also apply for the ULK1/2-PXN  
421 complex. For example, ULK1/2 might relay mechanical signals to downstream machinery by  
422 phosphorylating PXN in response to mechanical stimuli where both AMPK and mTOR are activated,  
423 but redirect PXN (and perhaps other FA components) for stress-induced autophagy under starvation  
424 conditions, when AMPK is activated and mTOR is inhibited. Thus, our study establishes a ULK1/2-  
425 PXN signaling nexus in mechanotransduction in breast tumors, which may function as a molecular  
426 switch between mechanotransduction and autophagy regulation.

427 The macromolecular assembly of FAs in the cytoplasm is facilitated by LLPS. Several lines  
428 of evidence suggest that the phase separation properties of FA-associated proteins, and therefore  
429 FA dynamics, are modulated by ECM mechanical stimuli (Case et al., 2022; Li et al., 2020; Wang et  
430 al., 2021; Zhu et al., 2020). For example, LIMD1, which is structurally similar to PXN, was recently  
431 shown to undergo LLPS and mechanical force-dependent localization to mature FAs (Wang et al.,  
432 2021). Yet, how the dynamics of FAs are regulated in response to mechanostimulation, and the role  
433 of LLPS in this process, are much less clear. To our knowledge, the present study represents the first  
434 demonstration of a causal relationship between posttranslational modification and LLPS, FA  
435 dynamics, mechanotransduction, and tumor metastasis. Significant efforts are being devoted to  
436 targeting the biophysical properties of biomolecular condensates for treating disease. Hence,  
437 modulating the material properties of FAs, which are membrane-associated condensates, could  
438 provide a new perspective for breast cancer therapy.

439 Our studies also demonstrate that ULK1/2 and FAK/Src act oppositely in  
440 mechanotransduction by competitive phosphorylation. Phosphorylation of PXN by one kinase  
441 (ULK1/2 or FAK/Src) substantially attenuated the phosphorylation of PXN by the other (FAK/Src or  
442 ULK1/2) both *in vitro* and in cells, and we found that phosphorylation by these kinases acted  
443 antagonistically in mechanotransduction. Such a precise regulatory mechanism likely entails an

444 upstream kinase to coordinate the activity of ULK1/2 and FAK/Src such that cells properly respond to  
445 mechanical stimulation. The identity of such kinase(s) remains unknown. Importantly, FAK/Src-  
446 mediated phosphorylation at Y31 and Y113, and ULK1/2-mediated phosphorylation at the  
447 neighboring S32 and S119, are evolutionarily conserved in the vertebrates, highlighting the  
448 importance of this signaling nexus. Such an elegant regulatory mechanism by serine and tyrosine  
449 kinases reflects the intricate cellular programs to gate-keep mechanosensing and  
450 mechanotransduction.

451           Dysfunctional mechanosensing and mechanotransduction contribute to tumorigenesis and  
452 metastasis (Broders-Bondon et al., 2018; Riehl et al., 2020). Non-tumorous cells are sensitive to  
453 mechanical cues from the ECM. In contrast, tumorous cells often are refractory to these cues and  
454 gain uncontrolled growth and migration. Here, we reveal that breast cancer cells hijack the  
455 suppressive forces of mechanotransduction mediated by the ULK1/2-PXN complex and boost the  
456 mechanotransduction-promoting mechanisms fulfilled by the FAK/Src-PXN complex to accelerate  
457 tumor metastasis. We propose that the ULK1/2-PXN-FAK/Src signaling node in the  
458 mechanotransduction pathway can be targeted to treat breast tumors. In fact, FAK inhibitors hold  
459 great promise for breast cancer treatment (Lorusso et al., 2022; Timbrell et al., 2021). As ULK1/2  
460 agonists are now commercially available, augmenting ULK1/2 kinase activity may represent a new  
461 therapeutic avenue.

462

## 463 **Materials and methods**

### 464 **Clinical tissue analysis**

465 Clinical study was approved by the Medical Ethics Committee of Zhongshan Hospital Affiliated to  
466 Xiamen University in accordance with the Declaration of Helsinki. All breast tissues were obtained  
467 from the tissue bank of Zhongshan Hospital (Xiamen University). Case 1 and 3 are luminal A (ER<sup>+</sup>  
468 and PR<sup>+</sup>); Case 2 and 5 are luminal B (HR<sup>+</sup> and HER-2<sup>+</sup>); Case 4 and 6 are HER-2-enriched (ER<sup>-</sup>,  
469 PR<sup>-</sup>, and HER-2<sup>+</sup>). Tissue samples were lysed in ice-cold lysis buffer and subjected to immunoblot  
470 analyses.

### 471 ***In vivo* tail vein injection**

472 MDA-MB-231 cell lines stably expressing luciferase ( $1 \times 10^6$  cells per mouse) were injected into  
473 female nude mice at 6-8 weeks through tail vein. 4 weeks after injection, mice were intraperitoneally  
474 injected with 10 mg/ml D-luciferin (Acme Biochemical; D37330) and imaged using Caliper IVIS  
475 Lumina II. Total photon flux was measured. These experiments were performed in accordance with  
476 protocol approved by the Animal Care and Use Committee of Xiamen University.

### 477 **Plasmids**

478 cDNA was amplified by using a standard PCR-based approach. DNA restriction endonucleases  
479 were used to linearize vector backbones and the target fragments were amplified by high-fidelity  
480 DNA polymerase 2 × Phanta Max Master Mix (Vazyme; P515-01). 2 × MultiF Seamless Assembly  
481 Kit was used to construct the plasmids (Abclonal; RK21020). Sanger sequencing was performed to  
482 confirm sequence accuracy.

### 483 **Cell culture, transient transfection, lentivirus infection, and drug treatment**

484 The HEK293T (CRL-1573), MDA-MB-231 (HTB-26), HeLa (CCL-2) cell lines were purchased from  
485 (American Type Culture Collection; ATCC). Cells were cultured in DMEM (L120KJ) containing 10%  
486 fetal bovine serum (Moybio; S450), penicillin/streptomycin (BasalMedia; S110JV), and Glutamax  
487 (BasalMedia; S210JV) at 37°C (5% CO<sub>2</sub>).

488 For transient expression, transfections were performed with Polyethyleneimine Linear  
489 (BIOHUB; 78PEI25000) or Lipofectamine 2000 (Thermo Fisher; 11668019) according to the  
490 manufacturer's instructions. Knockdown experiments were performed with Lipofectamine RNAi Max  
491 (Life Technologies; 13778075) according to the manufacturer's instructions. shRNA sequences were  
492 as follows: sh*ULK1* sense 5'- CG CGGTACCTCCAGAGCAA -3'; sh*ULK2* sense 5'-CCA

493 GTTCCTACTCAAATAAC-3'; sh*FIP200* sense; sh*ATG7* sense 5'-GCTATTGGAACACTGTATAAC-  
494 3'; sh*ATG13* sense: 5'-GAGAAGAATGTCCGAGAAT-3'; sh*ATG14* sense 5'-  
495 GGGAGAGGTTTATCGACAAGA-3'. The siRNAs synthesized by GenePharma (Shanghai, China)  
496 were used as follows: si*ULK1*: 5'-CGCGGUACCUCCAGAGCAATT-3' and 5'-  
497 UUGCUCUGGAGGUACCGCGTT-3'; si*FIP200*: 5'-CUGGGACGGAUACAAUCCAA-3' and 5'-  
498 UUGGAUUUGUAUCCGUCCCAG-3'; si*ATG7*: 5'-GGAGUCACAGCUCUCCUUTT-3' and 5'-  
499 AAGGAAGAGCUGUGACUCCTT-3'; si*ATG13*: 5'-CCAUGUGUGUGGAGAUUUUCACUUAA-3' and  
500 5'-UUAAGUGAAAUCUCCACACACAUGG-3'; si*ATG14*: 5'-GGCAAUCUUCGACGAUCCCAUUA-  
501 3' and 5'-UAUAUGGGAUCGUCGAAGAUUUGCC-3',

502 All shRNAs were constructed using pLKO.1 retroviral vector; inducible ULK1 WT/KD and  
503 ULK2 WT/KD were constructed in pCW57.1 retroviral vector. To generate MDA-MB-231 and HeLa  
504 cells stably expressing WT or mutant forms of PXN, lentivirus was produced by co-transfecting 293T  
505 cells with psPAX2 (Addgene; #12260), pMD2.G (Addgene; #12259) and pLV retroviral vectors  
506 containing different *PXN* cDNAs. Supernatants were harvested at 48 h and 60 h and centrifuged at  
507 8000 rpm for 3 min (RT), and then filtered with a 0.22  $\mu$ m filter. Polybrene (Santa Cruz Technology;  
508 sc-134220) was added to facilitate infection. The transduced cells were FACS-sorted by the  
509 presence of GFP or selected with antibiotics.

510 All the chemicals were dissolved in DMSO. SBI-0206965 (20 mM, 18 h), blebbistatin (20  
511 mM, 2 h), Rho activator II (1 mg/mL, 4 h), and Cytochalasin D (5  $\mu$ M, 3 h) were directly added to the  
512 medium.

### 513 **Generation of knock-out cell lines with CRISPR/Cas9**

514 *PXN* knockout cells were created through the CRISPR/Cas9 technology. The guide RNA sequences  
515 were designed using online tool the Optimized CRISPR Design  
516 (<https://portals.broadinstitute.org/gppx/crispick/public>). The guide sequence was 5'-  
517 ATCCCGGAACCTTCTCGAGC-3' for human *PXN*, for 5'-GCCAAGTCTCAGACGCTGCT-3' human  
518 *ULK1*, for 5'-ATCTTCCAACCTGTTAGCCT-3' human *ULK2*. Cells were transiently transfected with  
519 PX459 (Addgene; #48139) and selected with puromycin for 2 days. The pool was scattered into a 10  
520 cm petri dish. Single clones were picked up and expanded for sequencing and immunoblotting  
521 analyses.

### 522 **Immunoblotting**

523 Cells were harvested and lysed with ice cold lysis buffer (20 mM Tris-HCl, pH 7.5, 150 mM NaCl, 1  
524 mM EDTA, 1 mM EGTA, 1% Triton X-100, 2.5 mM sodium pyrophosphate, 1 mM  $\beta$ -

525 glycerolphosphate, protease inhibitor cocktail). The lysates were then centrifuged to clear cell debris.  
526 The supernatant was then prepared with an equal amount of 2 × SDS sample buffer, and  
527 electrophoretically separated on SDS-PAGE gels. Proteins were transferred to PVDF membranes.  
528 After blocking with 5% skin milk, the membranes were probed with the following primary antibodies:  
529 rabbit anti-phospho-PXN (Y31) (Invitrogen; 2024882), rabbit anti-phospho-PXN (Y118) (Cell  
530 Signaling Technology; 2541S), rabbit anti-PXN (Proteintech; 10029-1-Ig), rabbit anti-PXN (Abcam;  
531 ab32084), rabbit anti- $\alpha$ -tubulin (Cell Signaling Technology; 2125S), rabbit anti-FAK (Cell Signaling  
532 Technology; 3285S), rabbit anti-phospho-FAK (Y397) (Abcam; ab81298), rabbit anti-phospho-FAK  
533 (Y925) (Abcam; ab38512), mouse anti-Flag (GNI; GNI4110-FG), rabbit anti-Vinculin (Proteintech;  
534 26520-1-AP), mouse anti-GAPDH (Santa; sc-32233), rabbit anti-Kindlin-2 (Proteintech; 11453-1-  
535 AP), rabbit anti-HIC-5 (Proteintech; 10565-1-AP), mouse anti-HIC-5 (BD Transduction; 611164),  
536 mouse anti- $\beta$ -actin (Proteintech; 66009-1-Ig), mouse anti-GIT1 (BD Transduction; 611396), rabbit  
537 anti-Src (Cell Signaling; 2109S), rabbit anti-phospho-Src (Y416) ( Cell Signaling; 59548S), rabbit  
538 anti-phospho-Src (Y527) ( Cell Signaling; 2105T), mouse anti-Integrin  $\beta$ 1 (Abcam; ab30394), mouse  
539 anti-Integrin  $\alpha$ 2 $\beta$ 1 (Abcam; ab24697), rabbit anti- $\alpha$ -smooth muscle Actin (Abcam; ab5694), rabbit  
540 anti-phospho-Myosin II (S19) (Cell Signaling; 3675S), rabbit anti-ATG5 (Abclonal; A19677), rabbit  
541 anti-ATG7(Abclonal; A19604), rabbit anti-ATG13 (Proteintech; 18258-1-AP), rabbit anti-ATG14  
542 (Proteintech; 24412-1-AP), rabbit anti-phospho-ATG14 (S29) (Cell Signaling; 92340S), mouse anti-  
543 Myc-Tag (Abclonal; AE010), rabbit anti-FIP200 (Abclonal; A14685), rabbit anti-P62 (Cell Signaling;  
544 48768T), rabbit anti-ULK1 (Cell Signaling; 8054S), Rabbit anti-LC3B(Cell Signaling; 3868S), rabbit  
545 anti-Phospho-Phe (Ser/Thr) ( Cell Signaling; 9631S), mouse anti-mTOR (Proteintech; 66888-1-Ig),  
546 rabbit anti-AMPK $\alpha$  (Proteintech; 10929-2-AP). The membranes were then incubated with HRP-  
547 conjugated secondary antibodies (Jackson ImmunoResearch; 115-035-003, 111-035-003), and  
548 bands were detected using chemiluminescence detection kit (Merck Millipore; WBKLS0050).

#### 549 **Immunoprecipitation and pull-down**

550 Cells were lysed by lysis buffer (20 mM Tris-HCl, pH 7.5, 150 mM NaCl, 1% Triton X-100, 1 mM EDTA,  
551 1 mM EGTA, 1 mM  $\beta$ -glycerolphosphate, 2.5 mM Sodium pyrophosphate, 1  $\mu$ M leupeptin, 2 mM  
552 Na<sub>3</sub>VO<sub>4</sub> and 1 mM phenylmethylsulfonyl fluoride) after washed by PBS. Lysates were centrifuged at  
553 10,000 rpm for 10 min at 4°C, and supernatants were incubated with anti-DYKDDDDK G1 Affinity  
554 beads (Genscript; L00432-10) or anti-GFP magnetic beads (Bio-Linkedin; L-1016A) for 3 h at 4°C.  
555 Beads were washed 3 times with lysis buffer and the immunoprecipitates were eluted with 2 x SDS  
556 sample buffer. SDS elutions were analyzed by western blotting.

557 His<sub>6</sub>-tagged proteins (His-FAK/Src/Vinculin/Kindlin-2) were first incubated with 20  $\mu$ L Ni-NTA

558 agarose (Nuptec; NRPB57L-100) in pull-down buffer (50 mM HEPES pH 7.5, 150 mM NaCl, 1mM  
559 DTT and 0.1% Triton-100x) at 4°C for 3 h. Then the beads were centrifuged and the supernatants  
560 were discarded. After that, 4 µg proteins without the His tag were added and incubated for another 30  
561 min. After washing 2 times with pull-down buffer, bound proteins were denatured with 2 x SDS sample  
562 buffer, and subjected to western blotting.

### 563 ***In vitro* kinase assay**

564 Flag-tagged ULK1/2 kinases were derived from transfected 293T cells by anti-DYKDDDDK G1 Affinity  
565 beads. 5 µg purified PXN and 2 µg kinase were added to the *in vitro* kinase assay buffer (50 mM Tris-  
566 HCl, pH 7.6, 1 mM dithiothreitol, 100 mM MgCl<sub>2</sub>, 1 mM ATP) and incubate for 30 min at 37°C. The  
567 samples were subjected to western blotting.

### 568 **Immunofluorescence**

569 Cells seeded on glass coverslips were fixed with 4% PFA (Leagene; DF0135) at RT for 10 min,  
570 permeabilized with 0.1% Triton X-100 (diluted in PBS), then blocked with 3% BSA, and incubated with  
571 primary antibodies overnight at 4°C. The following primary antibodies were used: mouse anti-Flag  
572 (GNI; GNI4110-FG), rabbit anti-Vinculin (Proteintech; 26520-1-AP), mouse anti-HA (Santa Cruz; sc-  
573 7392), and rabbit anti-PXN (Abcam; ab32084). The cells were then incubated with Alexa-Fluor-  
574 conjugated secondary antibody (Jackson ImmunoResearch; 115-545-003, 115-585-003) for 1 hour at  
575 RT in the dark, and mounted on slides with mounting media (SouthernBiotech; 0100-01). Samples  
576 were imaged by Zeiss LSM 900 confocal microscopy with a 63x oil objective.

### 577 **Protein expression and purification**

578 For protein expression, plasmids were transformed into BL21(DE3) *E. coli* cells (AngYu; G6030-10).  
579 A single colony was inoculated into LB media containing ampicillin and grown in LB media to an  
580 optical density of 0.6-0.8 at 37°C, followed by overnight induction with 1 mM isopropyl-b-D-thio-  
581 galactopyranoside (IPTG) at 16°C. Cells were pelleted and resuspended in binding buffer (20 mM  
582 Tris pH 7.5, 500 mM NaCl) and lysed using a homogenizer. The lysates were cleared by  
583 centrifugation and purified by Ni-NTA agarose (Nuptec; NRPB57L-100). The proteins were eluted  
584 with elution buffer (20 mM Tris pH 7.5, 500 mM NaCl, 300 mM imidazole). Eluate was concentrated  
585 and cleaved with TEV protease at 4°C. The cleaved tags and TEV protease were separated from the  
586 protein samples by a second round of Ni-NTA affinity chromatography followed by a Sephadex 200  
587 size-exclusion column in 20 mM Hepes, 100 mM NaCl, pH 8.0. The collected fractions were then  
588 verified with SDS-PAGE. Purified fractions were pooled, concentrated, and flash-frozen in liquid  
589 nitrogen. FAK purification has been described previously (Wang et al., 2022).



## 590 **Gel contraction assay**

591  $6 \times 10^5$  cells were resuspended in 750  $\mu\text{L}$  medium and added to 200  $\mu\text{L}$  rat tail tendon collagen type I  
592 (Shengyou; 200110-50), followed by intensive mixing. The cells and collagen mixture were then  
593 seeded into a 6-well plate and cultured at  $37^\circ\text{C}$  with 5%  $\text{CO}_2$  for 30 min. The collagen gels were  
594 isolated from the well by shaking gently and then 2 mL medium was added into each well. Photographs  
595 of the collagen gels were taken at 0, 16, 32 and 48 h. Fiji was used to measure the area of collagen  
596 gels at each time point.

## 597 **Atomic force microscopy**

598 AFM experiments were carried out in a Bruker Nanowizard 4 (JPK) mounted onto an inverted optical  
599 microscope (Zeiss Observer 7; Zeiss, Germany). Force indentation measurements were carried out  
600 using in-house-prepared AFM colloidal probes (a spherical silica bead with a diameter of 10  $\mu\text{m}$  glued  
601 on the cantilever by epoxy). Before each experiment, we performed a calibration to determine the  
602 elastic coefficient of the cantilever. During the experiment, cells were kept at  $37^\circ\text{C}$  in 1 x PBS buffer.  
603 Indentations were performed at a loading force of 0.5 nN and a constant speed of 4  $\mu\text{m/s}$ . Young's  
604 modulus was obtained by fitting the force-distance curve to the Hertzian sphere model.

## 605 **Preparation of PA gels**

606 Preparation of PA gels with different stiffness was done as previously described (Denisin and Pruitt,  
607 2016). The acrylamide mix was dropped on the glass slides. PA gels were removed from the slide  
608 glass after solidification. The stiffness of PA gels was measured by AFM.

609 We functionalized the PA gels with fibronectin according to the following procedure: (1) PA  
610 gels were treated with soaking buffer (137 mM NaCl, 5% glycerol) for 1 hour; (2) After removing the  
611 soaking buffer, the PA gels were further treated with buffer mix containing EDC/NHS and  
612 conjugation buffer (0.2 M MES, 10% glycerol, pH 4.5) in the dark; (3) The gels were coated with  
613 fibronectin at a final concentration of 50  $\mu\text{g/mL}$  at  $4^\circ\text{C}$  overnight.

## 614 **Traction force microscopy**

615 We manufactured a glass slide with a chamber, and spread PA gel (8 kPa) embedded with 580/605  
616 100 nm-diameter on the bottom of the chamber. The cells were allowed to adhere to the substrate for  
617 at least 12 h prior to imaging. Fluorescence images of the embedded beads were captured on LSM  
618 980 (Zeiss) confocal imaging system. After collecting the images of the beads, 0.25% trypsin/EDTA  
619 was added to detach the cells for at least 5 min, and images of the bead position without cellular



620 forces were captured. Displacement of the beads and reconstruction of force field were calculated  
621 based on Matlab algorithm (<https://github.com/DanuserLab/TFM>) The corresponding gel deformations  
622 were obtained by 2D Gaussian distribution interpolation. Using an algorithm based on Fourier  
623 transform, the stress field of the gel deformation was calculated.

#### 624 **Transwell assay**

625  $3 \times 10^4$  cells were seeded into the upper chamber of the transwell plates (Corning Incorporated; 3422)  
626 in FBS-free medium. Medium containing 10% FBS were added to the lower compartment as  
627 chemoattractant. After incubation at 37°C for 16-18 h, the migrated cells were fixed by 4% PFA  
628 (Leagene; DF0135) for 10 min and stained with 0.2% (w/v) crystal violet (Sangon Biotech; A600331-  
629 0100) for 10 min and washed with ddH<sub>2</sub>O. The stained cells were imaged by Olympus IX51 4 x  
630 objective, and Fiji was used to count the cell number. All migration assays were repeated at least 3  
631 times.

#### 632 **Fluorescence recovery after photo-bleaching**

633 FRAP experiments were performed using water lens on a Cell Discoverer 7 (*Zeiss*) system. Cells  
634 were maintained at 37°C and 5% CO<sub>2</sub>. Cells were imaged for a total of 100 s at a maximum rate of 1  
635 frame per s. After 3 pre-bleach frames, the fluorescence signal from a region of interest (2 μm × 2  
636 μm) was bleached with a 488 nm laser at 100% power. The signal from the bleached ROI was  
637 measured for 90 s afterwards. We used ZEN to derive the raw fluorescence values. EasyFRAP  
638 software (<https://easyfrap.vmnet.upatras.gr/>) was used for rectify and normalize the data.

#### 639 **Protein labelling**

640 The Fluro 488 NHS ester (AAT Bioquest; 1810) or Cy3 NHS ester (AAT Bioquest; 271) were  
641 dissolved in DMSO at a concentration of 10 mg/mL. The labelling dye was incubated with the target  
642 protein 1:1 (molar ratio) at RT for 1 hour with continuous stirring. Free dye was removed using a  
643 desalting column (Merck Millipore; UFC501024), the labeled proteins was aliquoted and flash-frozen  
644 in liquid nitrogen.

#### 645 ***In vitro* LLPS assay**

646 Mixtures in a total solution volume of 2 μL were placed in on slides with double-sided tape. Cover  
647 glasses were placed on top to seal the slides. Droplet formation of purified protein was monitored by  
648 fluorescence microscopy using a confocal microscope (Zeiss LSM 900).

## 649 **Size-exclusion chromatography coupled with multi-angle light scattering (SEC-MALS)**

650 SEC-MALS experiments were carried out on DAWN HELEOS-II (Wyatt Technology Corporation)  
651 coupled with a Shimadzu liquid chromatography system equipped with a Superdex 200 10/300 GL  
652 (GE Healthcare) gel-filtration column. Protein samples for this experiment were dialyzed to a buffer  
653 containing 20 mM Tris (pH 7.2), 400 mM NaCl, 2 mM DTT, and 0.03% NaN<sub>3</sub>. 200  $\mu$ L proteins at a  
654 concentration of 0.02-0.05 mM were injected and run at a flow rate of 0.03 mL/min. The ASTRA  
655 version 6.0.5 (Wyatt Technology Corporation) was used for data collection and analyses.

## 656 **Quantification and statistical analyses**

657 Measurements of adhesion area were done with the Imaris software (Bitplane) using the surface  
658 reconstruction tool.

659 To quantify protein colocalization, the cloco2 plug-in (Analyze-Colocalization-Coloc 2) of the  
660 image j software was used to calculate the Pearson correlation coefficient between the two target  
661 channels per the instructions.

662 Actin filament were analyzed by applying a steerable filter approach with a deposited software  
663 FSegment (<http://www2.medizin.uni-greifswald.de/anatomie/forschung/niere/fsegment/>). We counted  
664 the total length of microfilaments in each image, and then calculated the average length of each cell.

665 All analyses were performed blindly. All quantitative data are shown as mean  $\pm$  SEM or median  
666  $\pm$  95% confidence interval from  $n \geq 3$  biological replicates unless otherwise specified. Statistical  
667 significance was determined by Student's t-test or ANOVA as appropriate, and \* $p < 0.05$  was  
668 considered statistically significant. Statistical parameters are also reported in the figures and legends.

669

## 670 **Declaration of interests**

671 The authors declare no competing interests

672

## 673 **Acknowledgements**

674 We are grateful to Dr. Shuguo Sun (Huazhong University of Science and Technology), and Dawang  
675 Zhou (Xiamen University) for providing plasmids. We thank Dr. Natalia Nedelsky (St. Jude Children's  
676 Research Hospital) for editing the manuscript. All imaging data were acquired in the Core Facility of

677 Biomedical Sciences, Xiamen University. This work was supported by the National Natural Science  
678 Foundation of China (32071235 to B.W.) and Guangdong Basic and Applied Basic Research  
679 Foundation (2020A1515111186 to B.W.).

680 **References**

- 681 Abbi, S., Ueda, H., Zheng, C., Cooper, L.A., Zhao, J., Christopher, R., and Guan, J.L. (2002). Regulation  
682 of focal adhesion kinase by a novel protein inhibitor FIP200. *Mol Biol Cell* **13**, 3178-3191.
- 683 Alpha, K.M., Xu, W., and Turner, C.E. (2020). Paxillin family of focal adhesion adaptor proteins and  
684 regulation of cancer cell invasion. *Int Rev Cell Mol Biol* **355**, 1-52.
- 685 Assar, E.A., and Tumbarello, D.A. (2020). Loss of the Essential Autophagy Regulators FIP200 or Atg5  
686 Leads to Distinct Effects on Focal Adhesion Composition and Organization. *Front Cell Dev Biol* **8**,  
687 733.
- 688 Bays, J.L., Campbell, H.K., Heidema, C., Sebbagh, M., and DeMali, K.A. (2017). Linking E-cadherin  
689 mechanotransduction to cell metabolism through force-mediated activation of AMPK. *Nat Cell Biol* **19**,  
690 724-731.
- 691 Bernstein, B.W., and Bamburg, J.R. (2003). Actin-ATP hydrolysis is a major energy drain for neurons. *J*  
692 *Neurosci* **23**, 1-6.
- 693 Bressan, C., Pecora, A., Gagnon, D., Snappyan, M., Labrecque, S., De Koninck, P., Parent, M., and  
694 Saghatelian, A. (2020). The dynamic interplay between ATP/ADP levels and autophagy sustain  
695 neuronal migration in vivo. *Elife* **9**.
- 696 Broders-Bondon, F., Nguyen Ho-Bouloires, T.H., Fernandez-Sanchez, M.E., and Farge, E. (2018).  
697 Mechanotransduction in tumor progression: The dark side of the force. *J Cell Biol* **217**, 1571-1587.
- 698 Brown, M.C., and Turner, C.E. (2004). Paxillin: adapting to change. *Physiol Rev* **84**, 1315-1339.
- 699 Case, L.B., De Pasquale, M., Henry, L., and Rosen, M.K. (2022). Synergistic phase separation of two  
700 pathways promotes integrin clustering and nascent adhesion formation. *Elife* **11**.
- 701 Chen, G.C., Lee, J.Y., Tang, H.W., Debnath, J., Thomas, S.M., and Settleman, J. (2008). Genetic  
702 interactions between *Drosophila melanogaster* Atg1 and paxillin reveal a role for paxillin in  
703 autophagosome formation. *Autophagy* **4**, 37-45.
- 704 Deakin, N.O., and Turner, C.E. (2008). Paxillin comes of age. *J Cell Sci* **121**, 2435-2444.
- 705 Denisin, A.K., and Pruitt, B.L. (2016). Tuning the Range of Polyacrylamide Gel Stiffness for  
706 Mechanobiology Applications. *ACS Appl Mater Interfaces* **8**, 21893-21902.
- 707 Dikic, I., and Elazar, Z. (2018). Mechanism and medical implications of mammalian autophagy. *Nat Rev*  
708 *Mol Cell Biol* **19**, 349-364.
- 709 Dower, C.M., Bhat, N., Wang, E.W., and Wang, H.G. (2017). Selective Reversible Inhibition of Autophagy  
710 in Hypoxic Breast Cancer Cells Promotes Pulmonary Metastasis. *Cancer Res* **77**, 646-657.
- 711 Ebright, R.Y., Lee, S., Wittner, B.S., Niederhoffer, K.L., Nicholson, B.T., Bardia, A., Truesdell, S., Wiley,  
712 D.F., Wesley, B., Li, S., *et al.* (2020). Deregulation of ribosomal protein expression and translation  
713 promotes breast cancer metastasis. *Science* **367**, 1468-1473.

- 714 Horton, E.R., Byron, A., Askari, J.A., Ng, D.H.J., Millon-Fremillon, A., Robertson, J., Koper, E.J., Paul,  
715 N.R., Warwood, S., Knight, D., *et al.* (2015). Definition of a consensus integrin adhesome and its  
716 dynamics during adhesion complex assembly and disassembly. *Nat Cell Biol* *17*, 1577-1587.
- 717 Joo, J.H., Wang, B., Frankel, E., Ge, L., Xu, L., Iyengar, R., Li-Harms, X., Wright, C., Shaw, T.I., Lindsten,  
718 T., *et al.* (2016). The Noncanonical Role of ULK/ATG1 in ER-to-Golgi Trafficking Is Essential for  
719 Cellular Homeostasis. *Mol Cell* *62*, 982.
- 720 Kenific, C.M., Wittmann, T., and Debnath, J. (2016). Autophagy in adhesion and migration. *J Cell Sci* *129*,  
721 3685-3693.
- 722 Kim, J., Kundu, M., Viollet, B., and Guan, K.L. (2011). AMPK and mTOR regulate autophagy through  
723 direct phosphorylation of Ulk1. *Nat Cell Biol* *13*, 132-141.
- 724 Kuo, J.C., Han, X., Hsiao, C.T., Yates, J.R., 3rd, and Waterman, C.M. (2011). Analysis of the myosin-II-  
725 responsive focal adhesion proteome reveals a role for beta-Pix in negative regulation of focal  
726 adhesion maturation. *Nat Cell Biol* *13*, 383-393.
- 727 Lawson, C.D., and Burridge, K. (2014). The on-off relationship of Rho and Rac during integrin-mediated  
728 adhesion and cell migration. *Small GTPases* *5*, e27958.
- 729 Levental, K.R., Yu, H., Kass, L., Lakins, J.N., Egeblad, M., Emler, J.T., Fong, S.F., Csiszar, K., Giaccia, A.,  
730 Weninger, W., *et al.* (2009). Matrix crosslinking forces tumor progression by enhancing integrin  
731 signaling. *Cell* *139*, 891-906.
- 732 Li, Y., and Li, Z. (2021). Potential Mechanism Underlying the Role of Mitochondria in Breast Cancer Drug  
733 Resistance and Its Related Treatment Prospects. *Front Oncol* *11*, 629614.
- 734 Li, Y., Zhang, T., Li, H., Yang, H., Lin, R., Sun, K., Wang, L., Zhang, J., Wei, Z., and Yu, C. (2020).  
735 Kindlin2-mediated phase separation underlies integrin adhesion formation. *bioRxiv*,  
736 2020.2007.2010.197400.
- 737 Lorusso, G., Wyss, C.B., Kuonen, F., Vannini, N., Billottet, C., Duffey, N., Pineau, R., Lan, Q., Wirapati, P.,  
738 Barras, D., *et al.* (2022). Connexins orchestrate progression of breast cancer metastasis to the brain  
739 by promoting FAK activation. *Sci Transl Med* *14*, eaax8933.
- 740 Lv, W., Xiao, Y., Xu, Z., Jiang, H., Tong, Q., and Wang, Z. (2022). The Paxillin MoPax1 Activates Mitogen-  
741 Activated Protein (MAP) Kinase Signaling Pathways and Autophagy through MAP Kinase Activator  
742 MoMka1 during Appressorium-Mediated Plant Infection by the Rice Blast Fungus *Magnaporthe*  
743 *oryzae*. *mBio*, e0221822.
- 744 Mao, L., Zhan, Y.Y., Wu, B., Yu, Q., Xu, L., Hong, X., Zhong, L., Mi, P., Xiao, L., Wang, X., *et al.* (2020).  
745 ULK1 phosphorylates Exo70 to suppress breast cancer metastasis. *Nat Commun* *11*, 117.
- 746 Niklaus, N.J., Tokarchuk, I., Zbinden, M., Schlafli, A.M., Maycotte, P., and Tschan, M.P. (2021). The  
747 Multifaceted Functions of Autophagy in Breast Cancer Development and Treatment. *Cells* *10*.
- 748 Ohashi, K., Fujiwara, S., and Mizuno, K. (2017). Roles of the cytoskeleton, cell adhesion and rho  
749 signalling in mechanosensing and mechanotransduction. *J Biochem* *161*, 245-254.

- 750 Pal, B., Chen, Y., Vaillant, F., Capaldo, B.D., Joyce, R., Song, X., Bryant, V.L., Penington, J.S., Di Stefano,  
751 L., Tubau Ribera, N., *et al.* (2021). A single-cell RNA expression atlas of normal, preneoplastic and  
752 tumorigenic states in the human breast. *EMBO J* *40*, e107333.
- 753 Park, J.M., Seo, M., Jung, C.H., Grunwald, D., Stone, M., Otto, N.M., Toso, E., Ahn, Y., Kyba, M., Griffin,  
754 T.J., *et al.* (2018). ULK1 phosphorylates Ser30 of BECN1 in association with ATG14 to stimulate  
755 autophagy induction. *Autophagy* *14*, 584-597.
- 756 Parsons, J.T., Horwitz, A.R., and Schwartz, M.A. (2010). Cell adhesion: integrating cytoskeletal dynamics  
757 and cellular tension. *Nat Rev Mol Cell Biol* *11*, 633-643.
- 758 Riehl, B.D., Kim, E., Bouzid, T., and Lim, J.Y. (2020). The Role of Microenvironmental Cues and  
759 Mechanical Loading Milieus in Breast Cancer Cell Progression and Metastasis. *Front Bioeng*  
760 *Biotechnol* *8*, 608526.
- 761 Romani, P., Valcarcel-Jimenez, L., Frezza, C., and Dupont, S. (2021). Crosstalk between  
762 mechanotransduction and metabolism. *Nat Rev Mol Cell Biol* *22*, 22-38.
- 763 Russell, R.C., Tian, Y., Yuan, H., Park, H.W., Chang, Y.Y., Kim, J., Kim, H., Neufeld, T.P., Dillin, A., and  
764 Guan, K.L. (2013). ULK1 induces autophagy by phosphorylating Beclin-1 and activating VPS34 lipid  
765 kinase. *Nat Cell Biol* *15*, 741-750.
- 766 Salvi, A.M., and DeMali, K.A. (2018). Mechanisms linking mechanotransduction and cell metabolism. *Curr*  
767 *Opin Cell Biol* *54*, 114-120.
- 768 Sharifi, M.N., Mowers, E.E., Drake, L.E., Collier, C., Chen, H., Zamora, M., Mui, S., and Macleod, K.F.  
769 (2016). Autophagy Promotes Focal Adhesion Disassembly and Cell Motility of Metastatic Tumor Cells  
770 through the Direct Interaction of Paxillin with LC3. *Cell Rep* *15*, 1660-1672.
- 771 Shen, Y., Schmidt, B.U.S., Kubitschke, H., Morawetz, E.W., Wolf, B., Kas, J.A., and Losert, W. (2020).  
772 Detecting heterogeneity in and between breast cancer cell lines. *Cancer Converg* *4*, 1.
- 773 Shin, Y., Berry, J., Pannucci, N., Haataja, M.P., Toettcher, J.E., and Brangwynne, C.P. (2017).  
774 Spatiotemporal Control of Intracellular Phase Transitions Using Light-Activated optoDroplets. *Cell*  
775 *168*, 159-171 e114.
- 776 Tang, J., Deng, R., Luo, R.Z., Shen, G.P., Cai, M.Y., Du, Z.M., Jiang, S., Yang, M.T., Fu, J.H., and Zhu,  
777 X.F. (2012). Low expression of ULK1 is associated with operable breast cancer progression and is an  
778 adverse prognostic marker of survival for patients. *Breast Cancer Res Treat* *134*, 549-560.
- 779 Timbrell, S., Aglan, H., Cramer, A., Foden, P., Weaver, D., Pachter, J., Kilgallon, A., Clarke, R.B., Farnie,  
780 G., and Bundred, N.J. (2021). FAK inhibition alone or in combination with adjuvant therapies reduces  
781 cancer stem cell activity. *NPJ Breast Cancer* *7*, 65.
- 782 Totaro, A., Zhuang, Q., Panciera, T., Battilana, G., Azzolin, L., Brumana, G., Gandin, A., Brusatin, G.,  
783 Cordenonsi, M., and Piccolo, S. (2019). Cell phenotypic plasticity requires autophagic flux driven by  
784 YAP/TAZ mechanotransduction. *Proc Natl Acad Sci U S A* *116*, 17848-17857.
- 785 Ueda, H., Abbi, S., Zheng, C., and Guan, J.L. (2000). Suppression of Pyk2 kinase and cellular activities  
786 by FIP200. *J Cell Biol* *149*, 423-430.

- 787 Vera-Ramirez, L., Vodnala, S.K., Nini, R., Hunter, K.W., and Green, J.E. (2018). Autophagy promotes the  
788 survival of dormant breast cancer cells and metastatic tumour recurrence. *Nat Commun* 9, 1944.
- 789 Wang, B., Iyengar, R., Li-Harms, X., Joo, J.H., Wright, C., Lavado, A., Horner, L., Yang, M., Guan, J.L.,  
790 Frase, S., *et al.* (2018). The autophagy-inducing kinases, ULK1 and ULK2, regulate axon guidance in  
791 the developing mouse forebrain via a noncanonical pathway. *Autophagy* 14, 796-811.
- 792 Wang, B., and Kundu, M. (2017). Canonical and noncanonical functions of ULK/Atg1. *Curr Opin Cell Biol*  
793 45, 47-54.
- 794 Wang, B., Liang, P., Wu, Y., Zheng, S., Zhang, J., Yang, S., Wang, J., Ma, S., Zhang, M., Gu, Z., *et al.*  
795 (2022). PXN/Paxillin Phase Separation Promotes Focal Adhesion Assembly and Integrin Signaling.  
796 bioRxiv, 2022.2012.2017.520852.
- 797 Wang, B., Maxwell, B.A., Joo, J.H., Gwon, Y., Messing, J., Mishra, A., Shaw, T.I., Ward, A.L., Quan, H.,  
798 Sakurada, S.M., *et al.* (2019). ULK1 and ULK2 Regulate Stress Granule Disassembly Through  
799 Phosphorylation and Activation of VCP/p97. *Mol Cell* 74, 742-757 e748.
- 800 Wang, Y., Zhang, C., Yang, W., Shao, S., Xu, X., Sun, Y., Li, P., Liang, L., and Wu, C. (2021). LIMD1  
801 phase separation contributes to cellular mechanics and durotaxis by regulating focal adhesion  
802 dynamics in response to force. *Dev Cell* 56, 1313-1325 e1317.
- 803 Zachari, M., and Ganley, I.G. (2017). The mammalian ULK1 complex and autophagy initiation. *Essays*  
804 *Biochem* 61, 585-596.
- 805 Zhang, H., Ji, X., Li, P., Liu, C., Lou, J., Wang, Z., Wen, W., Xiao, Y., Zhang, M., and Zhu, X. (2020).  
806 Liquid-liquid phase separation in biology: mechanisms, physiological functions and human diseases.  
807 *Sci China Life Sci* 63, 953-985.
- 808 Zhu, J., Zhou, Q., Xia, Y., Lin, L., Li, J., Peng, M., Zhang, R., and Zhang, M. (2020). GIT/PIX Condensates  
809 Are Modular and Ideal for Distinct Compartmentalized Cell Signaling. *Mol Cell* 79, 782-796 e786.
- 810



811 **Figure Legends**

812 **Figure 1.** ULK1/2 regulate cell migration and mechanotransduction of breast cancer. **(A, B)** Lysates  
813 prepared from normal (N) and breast tumor (T) tissues were analyzed by immunoblot with the  
814 indicated antibodies. The relative band intensities were quantified by densitometry **(B)**. Data are  
815 presented as mean  $\pm$  SEM from 6 individual patients. Statistic difference was calculated by paired  
816 Student's t-test. **(C)** The 15 most significantly enriched pathways yielded from Gene Ontology  
817 analyses from deposited sc-RNAseq datasets of both normal and breast cancer patients. **(D)** Gene  
818 Set Enrichment Analysis of the same sc-RNAseq datasets. The 10 most significantly enriched  
819 pathways were shown. **(E)** The correlation of ULK1/2 RNA expression levels and survival of breast  
820 cancer patients. **(F)** Migratory potentials of WT or *ULK1*<sup>-/-</sup> MDA-MB-231 cells were assessed by  
821 transwell assay. The cells migrated to the lower chamber were stained with crystal violet **(F)**.  
822 Quantification of the cell number was show in **(G)**. Data are presented as mean  $\pm$  SEM. **(H)** Cell  
823 lysates prepared from *ULK1*<sup>-/-</sup> HeLa cells expressing EV, ULK1 WT or KD were analyzed by  
824 immunoblot using the indicated antibodies. **(I, J)** WT or *ULK1*<sup>-/-</sup> HeLa cells reconstituted with EV,  
825 ULK1 WT or KD were immunostained with antibodies against active integrin  $\beta$ 1 (12G10) and  
826 Vinculin. Representative confocal images were shown in **(I)**, and the relative intensities of active  
827 integrin  $\beta$ 1 in the FAs were quantified in **(J)**. **(K, L)** WT or *ULK1*<sup>-/-</sup> HeLa cells reconstituted with EV,  
828 ULK1 WT or KD were seeded in 3D collagen gels. The gel size at each time point was photographed  
829 **(K)** and measured **(L)**. Data are shown as mean  $\pm$  SEM from 3 independent experiments. **(M, N)** WT  
830 or *ULK1*<sup>-/-</sup> HeLa cells reconstituted with EV, ULK1 WT or KD were analyzed by TFM. The total  
831 cellular force was quantified in **(N)**.

832 ns, not significant; \*p < 0.05; \*\*p < 0.01; \*\*\*p < 0.001 by one-way ANOVA.

833 **Figure S1.** Related to Figure 1. **(A, B)** Lysates prepared from normal (N) and cancerous (T) breast  
834 tissues were analyzed by immunoblot with the indicated antibodies. The relative band intensities  
835 were quantified by densitometry **(B)**. Data are presented as mean  $\pm$  SEM from 6 individual patients.  
836 Statistic difference was calculated by paired Student's t-test. **(C)** mRNA expression levels of key  
837 genes in the autophagy pathway determined by sc-RNAseq from normal and malignant breast  
838 tissues. **(D)** Cell lysates prepared from WT MDA-MB-231 cells overexpressing EV, flag-tagged ULK1  
839 WT, KD, ULK2 WT or KD were analyzed with immunoblot. **(E)** Growth curves of MDA-MB-231 cells  
840 overexpressing EV, flag-tagged ULK1 WT or KD were determined by CCK8 assays. The  
841 experiments were repeated 2 times with similar trends. **(F)** Lysates prepared from *ULK1*<sup>-/-</sup> HeLa cells  
842 expressing EV, ULK1 WT or KD were analyzed by immunoblot. **(G, H)** *ULK1*<sup>-/-</sup> HeLa cells expressing  
843 EV, ULK1 WT or KD were subjected to transwell assay. The cells migrated to the lower chamber  
844 were stained with crystal violet **(G)**. Quantification of the cell number was show in **(H)**. Data are



845 presented as mean  $\pm$  SEM. **(I)** Lysate prepared from WT HeLa cells infected with shRNA against  
846 scramble (*Scr*), *ULK1*, *ATG13*, *FIP200*, *ATG7*, or *ATG14* were analyzed by immunoblot using the  
847 indicated antibodies. **(J, K)** WT HeLa cells infected with shRNA against scramble (*Scr*), *ULK1*,  
848 *ATG13*, *FIP200*, *ATG7*, or *ATG14* were subjected to transwell assays. Representative photographs  
849 of cells stained with crystal violet were shown in **(J)**. The number of cells was quantified in **(K)**. Data  
850 are presented as mean  $\pm$  SEM. **(L)** HeLa cells infected with shRNA against scramble (*Scr*), *ULK1*, or  
851 *ULK2* were analyzed by immunoblot. **(M)** Quantification of cell number of sh*Scr*, sh*ULK1*, or sh*ULK2*  
852 infected HeLa cells in the transwell assay. Data are presented as mean  $\pm$  SEM. **(N)** The relative  
853 band intensities from Figure 1H were quantified by densitometry. Data are presented as mean  $\pm$   
854 SEM from 3 independent experiments. **(O, P)** HeLa cells infected with shRNA against scramble  
855 (*Scr*), *ULK1*, *ATG13*, *FIP200*, *ATG7*, or *ATG14* were cultured in 3D collagen gels. The gel size was  
856 photographed **(O)** and quantified **(P)**. Data are shown as mean  $\pm$  SEM from 3 independent  
857 experiments.

858 ns, not significant; \* $p < 0.05$ ; \*\*\* $p < 0.001$  by one-way ANOVA.

859

860 **Figure 2.** ULK1/2 suppress stiffness-dependent cell spreading, actin reinforcement and FA  
861 assembly. **(A, B)** Lysates prepared from WT HeLa cells grown on surfaces with different stiffness  
862 were analyzed by immunoblot with the indicated antibodies **(A)**. The relative band intensities were  
863 quantified by densitometry **(B)**. Data are presented as mean  $\pm$  SEM from 3 independent  
864 experiments. **(C-E)** WT or *ULK1*<sup>-/-</sup> HeLa cells expressing EV, ULK1 WT or KD were grown on  
865 surfaces with different stiffness. The cells were stained with Phalloidin **(C)**. The cell area (median  $\pm$   
866 95% confidence interval) and F-actin length (mean  $\pm$  SD) were quantified and shown in **(D)** and **(E)**,  
867 respectively. **(F, G)** WT or *ULK2*<sup>-/-</sup> HeLa cells expressing EV, ULK2 WT or KD were grown on  
868 surfaces with different stiffness. The cell area (median  $\pm$  95% confidence interval) and F-actin length  
869 (mean  $\pm$  SD) were quantified and shown in **(F)** and **(G)**, respectively. **(H)** Young's modulus of WT or  
870 *ULK1*<sup>-/-</sup> HeLa cells expressing EV, ULK1 WT or KD was measured by AFM. **(I, J)** *ULK1*<sup>-/-</sup> HeLa cells  
871 expressing EV, ULK1 WT or KD cultured on surfaces with different stiffness were immunostained  
872 with Vinculin antibody to visualize FAs **(J)**. The size of FAs under each individual condition was  
873 quantified **(I)**. Data are presented as median  $\pm$  95% confidence interval. **(K, L)** *ULK1*<sup>-/-</sup> HeLa cells  
874 expressing EV, ULK1 WT or KD were treated with DMSO or blebbistatin. The cells were fixed at  
875 different time points after Cytochalasin D washout, and FAs were visualized by PXN immunostaining  
876 **(K)**. Total FA area was quantified. Data are presented as median  $\pm$  95% confidence interval.

877 ns, not significant; \* $p < 0.05$ ; \*\* $p < 0.01$ ; \*\*\* $p < 0.001$  by one-way ANOVA.

878 **Figure S2.** Related to Figure 2. **(A)** Representative masks of Phalloidin staining from Figure 2C. **(B-**  
879 **D)** HeLa cells transfected with shRNA against scramble, *ULK1*, *FIP200*, *ATG7*, *ATG13*, *ATG14* were  
880 cultured on surfaces with different stiffness. The cells were stained with Phalloidin **(B)**. The cell area  
881 (median  $\pm$  95% confidence interval) and F-actin length (mean  $\pm$  SD) were quantified and shown in  
882 **(C)** and **(D)**, respectively. **(E)** Genomic sequence of *ULK2*<sup>-/-</sup> HeLa cells. The arrow indicates the  
883 cleavage site by Cas9. The numbers listed on the right denote allele frequency. **(F, G)** *ULK1*<sup>-/-</sup> HeLa  
884 cells expressing EV, ULK1 WT or KD were subjected to live cell imaging to monitor cell spreading.  
885 Representative DIC images at different time points after cell seeding were shown in **(F)**. The cell  
886 area (median  $\pm$  95% confidence interval) was quantified **(G)**. **(H)** HeLa cells transfected with shRNA  
887 against scramble, *ULK1*, or *ULK2* were subjected to live cell imaging to monitor cell spreading. The  
888 cell area (median  $\pm$  95% confidence interval) was quantified. **(I)**. Cell lysates prepared from HeLa  
889 cells transfected with siRNA against non-target (NT), *ULK1*, *FIP200*, *ATG7*, *ATG13*, *ATG14* were  
890 analyzed with immunoblot using the indicated antibodies. **(J, K)** HeLa cells transfected with siRNA  
891 against NT, *ULK1*, *FIP200*, *ATG7*, *ATG13*, or *ATG14* were fixed and immunostained with antibodies  
892 against Vinculin **(J)**. FA size was quantified in **(K)**. Data are presented as median  $\pm$  95% confidence  
893 interval.

894 ns, not significant; \*p < 0.05; \*\*p < 0.01; \*\*\*p < 0.001 by one-way ANOVA.

895

896 **Figure 3.** ULK1/2 directly interact with and phosphorylate PXN at S32 and S119, in response to  
897 mechanical stimuli. **(A)** 293T cells were transfected with the indicated constructs and subjected to  
898 Myc immunoprecipitation. **(B)** Pull-down assays using ULK1 and ULK2 immunopurified from 293T  
899 cells and recombinant PXN. **(C)** Schematic illustrations of the different constructs of both ULK1 and  
900 PXN. **(D-F)** 293T cells transfected with the indicated constructs were subjected to Flag  
901 immunoprecipitation. **(G)** WT HeLa cells were transiently co-transfected with Flag-PXN and HA-GFP,  
902 HA-ULK1, or HA-ULK2. Cells were fixed and processed for immunostaining using Flag and HA  
903 antibodies. **(H)** Quantification of the colocalization between PXN and ULK1/2 from **(G)**. Data are  
904 presented as mean  $\pm$  SD. **(I)** Lysates prepared from 293T cells transfected with the indicated  
905 constructs were analyzed by immunoblot with the indicated antibodies. **(J)** Lysates prepared from  
906 293T cells transfected with different PXN mutants together with ULK1 or ULK2 were analyzed with  
907 the indicated antibodies. **(K)** *In vitro* kinase assay was performed using ULK1 or ULK2  
908 immunopurified from 293T cells and recombinant PXN. **(L)** *In vitro* kinase assay using ULK1 or  
909 ULK2 and PXN WT or 2SA mutant. **(M)** *PXN*<sup>-/-</sup> HeLa cells reconstituted with PXN WT or 2SA were  
910 seeded on surfaces with different stiffness. Immunoprecipitated PXN was analyzed by immunoblot  
911 with P(S/T)Phe antibody. **(N)** *PXN*<sup>-/-</sup> HeLa cells reconstituted with PXN WT or 2SA growing on glass

912 were treated with DMSO or SBI-0206965 (SBI). Immunoprecipitated PXN was analyzed by  
913 immunoblot with P(S/T) antibody. (O) The relative band intensities of P(S/T)Phe from (N) were  
914 quantified by densitometry. Data are presented as mean  $\pm$  SEM, n = 3 independent experiments.

915 ns, not significant; \*\*p < 0.01; \*\*\*p < 0.001 by one-way ANOVA.

916 **Figure S3.** Related to Figure 3. (A-E) 293T cells transfected with the indicated constructs were  
917 subjected to Flag immunoprecipitation. The eluted samples were analyzed by immunoblot using the  
918 indicated antibodies. (F) Lysates prepared from 293T cells transfected with the indicated constructs  
919 were analyzed by immunoblot with the indicated antibodies (top). The relative band intensities of  
920 P(S/T) were quantified by densitometry and plotted (bottom). (G) *PXN*<sup>-/-</sup> HeLa cells reconstituted with  
921 PXN WT or 2SA growing on glass were treated with DMSO or blebbistatin. PXN was  
922 immunoprecipitated and analyzed by immunoblot with P(S/T) antibody. (H) *PXN*<sup>-/-</sup> HeLa cells  
923 reconstituted with PXN WT or 2SA growing on 60 kPa gel were treated with DMSO or Rho activator  
924 II. PXN was immunoprecipitated and analyzed by immunoblot with P(S/T) antibody.

925

926 **Figure 4.** ULK1/2-mediated phosphorylation of PXN inhibits breast cancer cell mechanics. (A, B)  
927 WT or *PXN*<sup>-/-</sup> MDA-MB-231 cells reconstituted with EV, PXN WT, 2SA, or 2SD were subjected to  
928 transwell assay. The cells were stained with crystal violet (A). Quantification of cells migrated to the  
929 lower chambers was shown in (B). Data are presented as mean  $\pm$  SEM. (C, D) *PXN*<sup>-/-</sup> MDA-MB-231  
930 cells reconstituted with EV, PXN WT, 2SA, or 2SD were injected into nude mice through tail vein.  
931 Cells migrating to the lung were imaged with luciferase. Quantification of total photo flux per mouse  
932 were shown in (C). n = 7, 6, 7, and 5 for EV, PXN WT, 2SA, and 2SD, respectively. (E-H) WT or  
933 *PXN*<sup>-/-</sup> HeLa cells expressing EV, PXN WT, 2SA, or 2SD were grown on surfaces with different  
934 stiffness. The cells were stained with Vinculin antibody to visualize FAs and Phalloidin to detect F-  
935 actin. Quantification of cell area (median  $\pm$  95% confidence interval), F-actin length (mean  $\pm$  SD) and  
936 FA area (median  $\pm$  95% confidence interval) were shown in (E), (F), and (H), respectively.  
937 Representative images were shown in (G). (I) Young's modulus of WT or *PXN*<sup>-/-</sup> HeLa cells  
938 expressing EV, PXN WT, 2SA, or 2SD was measured by AFM. (J-K) WT or *PXN*<sup>-/-</sup> HeLa cells  
939 reconstituted with EV, PXN WT, 2SA, or 2SD were cultured in 3D collagen gels. The gel size at  
940 different time points were photographed (J) and quantified (K). Data are shown as mean  $\pm$  SEM from  
941 3 independent experiments. (L, M) WT or *PXN*<sup>-/-</sup> HeLa cells reconstituted with EV, PXN WT, 2SA, or  
942 2SD were analyzed by TFM. The total cellular force was quantified in (M).

943 ns, not significant; \*p < 0.05; \*\*p < 0.01; \*\*\*p < 0.001 by one-way ANOVA.

944 **Figure S4.** Related to Figure 4. **(A, B)** WT or *PXN*<sup>-/-</sup> HeLa cells reconstituted with EV, PXN WT,  
945 2SA, or 2SD were subjected to transwell assay. The cells were stained with crystal violet **(A)**.  
946 Quantification of cells migrated to the lower chambers was shown in **(B)**. Data are presented as mean  
947  $\pm$  SEM. **(C, D)** *PXN*<sup>-/-</sup> HeLa cells reconstituted with PXN WT or 2SD were transfected with shRNA  
948 against scramble or *ULK1*. These cells were then subjected to transwell assay. The cells migrated to  
949 the lower chambers were stained with crystal violet **(C)** and quantified **(D)**. Data are presented as  
950 mean  $\pm$  SEM. **(E, F)** WT or *PXN*<sup>-/-</sup> HeLa cells expressing EV, PXN WT, 2SA, or 2SD grown on  
951 surfaces with different stiffness were stained with Phalloidin to detect F-actin **(E)** and Vinculin  
952 antibody to visualize FAs **(F)**. **(G, H)** WT or *PXN*<sup>-/-</sup> HeLa cells expressing EV, PXN WT, 2SA, or 2SD  
953 grown on glass were treated with Cytochalasin D. The cells were fixed at different time points after  
954 Cytochalasin D washout, and visualized with Phalloidin, the masks of which were shown in **(G)**. F-  
955 actin length (mean  $\pm$  SD) were quantified. **(I, J)** Lysates were collected from *PXN*<sup>-/-</sup> HeLa cells  
956 expressing EV, PXN WT, 2SA, or 2SD and incubated with RTNK **(I)** or GST-PAK<sub>70-106</sub> (GST-PAK)  
957 **(J)**. The levels of total and active RhoA (RTNK bound) or active Rac1(GST-PAK bound) were then  
958 analyzed by coomassie blue staining and immunoblotting, respectively.

959 ns, not significant; \*\*p < 0.01; \*\*\*p < 0.001 by one-way ANOVA.

960

961 **Figure 5.** Phosphorylation of PXN by ULK1/2 alters its biophysical properties. **(A)** Phase diagram of  
962 PXN WT, 2SA, and 2SD with increasing protein concentrations **(B)** Representative images of LLPS  
963 of PXN WT, 2SA, 2SD at different concentrations. **(C)** Schematic illustrations of the Control-Cry2  
964 and PXN-Cry2 WT, 2SA, and 2SD. **(D, E)** Representative images of *PXN*<sup>-/-</sup> HeLa cells stably  
965 expressing Control-Cry2 or PXN-Cry2 WT, 2SA, 2SD constructs treated with 2 min of 488 nm blue  
966 light. The percentage of cells with Opto-PXN droplet formation was quantified **(E)**. Data are shown  
967 as mean  $\pm$  SEM from 3 independent experiments. **(F, G)** *PXN*<sup>-/-</sup> HeLa cells stably expressing GFP-  
968 PXN WT, 2SA, or 2SD were subjected to FRAP. The fluorescence intensity was monitored over time  
969 and quantified **(G)**. Data are shown as mean  $\pm$  SD. n = 9. **(H)** The molecular weight of recombinant  
970 WT or 2SD PXN was determined by multi-angle light scattering.

971 ns, not significant; \*\*\*p < 0.001 by one-way ANOVA.

972 **Figure S5.** Related to Figure 5. **(A)** Recombinant PXN proteins were separated by 8% SDS-PAGE  
973 gels, and visualized by Coomassie Blue. **(B)** PXN WT, 2SA, 2SD were overexpressed in the 293T  
974 cells, immunoprecipitated, and subjected to BS<sup>3</sup> treatment. The crosslinked PXN samples were  
975 separated by SDS-PAGE electrophoresis and detected by PXN antibody. **(C)** 293T cells transfected

976 with the indicated constructs were subjected to Flag immunoprecipitation. The eluted samples were  
977 analyzed by immunoblot using the indicated antibodies.

978

979 **Figure 6.** ULK1/2 and FAK act antagonistically to regulate cell mechanotransduction. **(A-D)** *PXN*<sup>-/-</sup>  
980 HeLa cells expressing EV, or PXN WT, 2YF, 2YE, 2YF/2SA, 2YE/2SD were stained with Vinculin  
981 antibody and Phalloidin. Quantification of cell area, F-actin length and FA area were shown in **(B)**,  
982 **(C)**, and **(D)**, respectively. **(E, F)** *PXN*<sup>-/-</sup> HeLa cells expressing EV, or PXN WT, 2YF, 2YE, 2YF/2SA,  
983 2YE/2SD were seeded in 3D collagen gels. The gel size was photographed **(E)** and quantified **(F)**.  
984 Data are shown as mean ± SEM from 3 independent experiments. **(G-J)** *In vitro* kinase assay was  
985 performed using the indicated proteins. The samples were analyzed by immunoblot with the  
986 indicated antibodies. **(K-N)** Pull-down assay using recombinant FAK and PXN mutants. The relative  
987 band intensities of PXN were determined by densitometry **(L)** and **(N)**. Data are shown as mean ±  
988 SEM from 3 independent experiments. **(O)** *PXN*<sup>-/-</sup> HeLa cells reconstituted with EV or Flag-tagged  
989 PXN WT, 2SA, 2SD were subjected to Flag immunoprecipitation. The eluted samples were analyzed  
990 by immunoblot with the indicated antibodies.

991 ns, not significant; \*p < 0.05; \*\*p < 0.01; \*\*\*p < 0.001 by one-way ANOVA.

992 **Figure S6.** Related to Figure 6. **(A)** Sequence alignment of PXN orthologs of different species. **(B)**  
993 *PXN*<sup>-/-</sup> HeLa cells stably expressing GFP-tagged PXN WT, 2YF, 2YE, 2YF/2SA, 2YE/2SD were  
994 verified by immunoblot. **(C)** *In vitro* kinase assay using Src and PXN WT, 2SA, or 2SD mutants. **(D-**  
995 **G)** Pull-down assay using recombinant Src and PXN mutants. The relative band intensities of PXN  
996 were determined by densitometry **(E)** and **(G)**. Data are shown as mean ± SEM from 3 independent  
997 experiments. **(H-K)** Pull-down assays using purified Vinculin or Kindlin-2 and the PXN mutants.

998 ns, not significant; \*\*p < 0.01; \*\*\*p < 0.001 by one-way ANOVA.



# Figure 1. ULK1/2 regulate cell migration and mechanotransduction of breast cancer

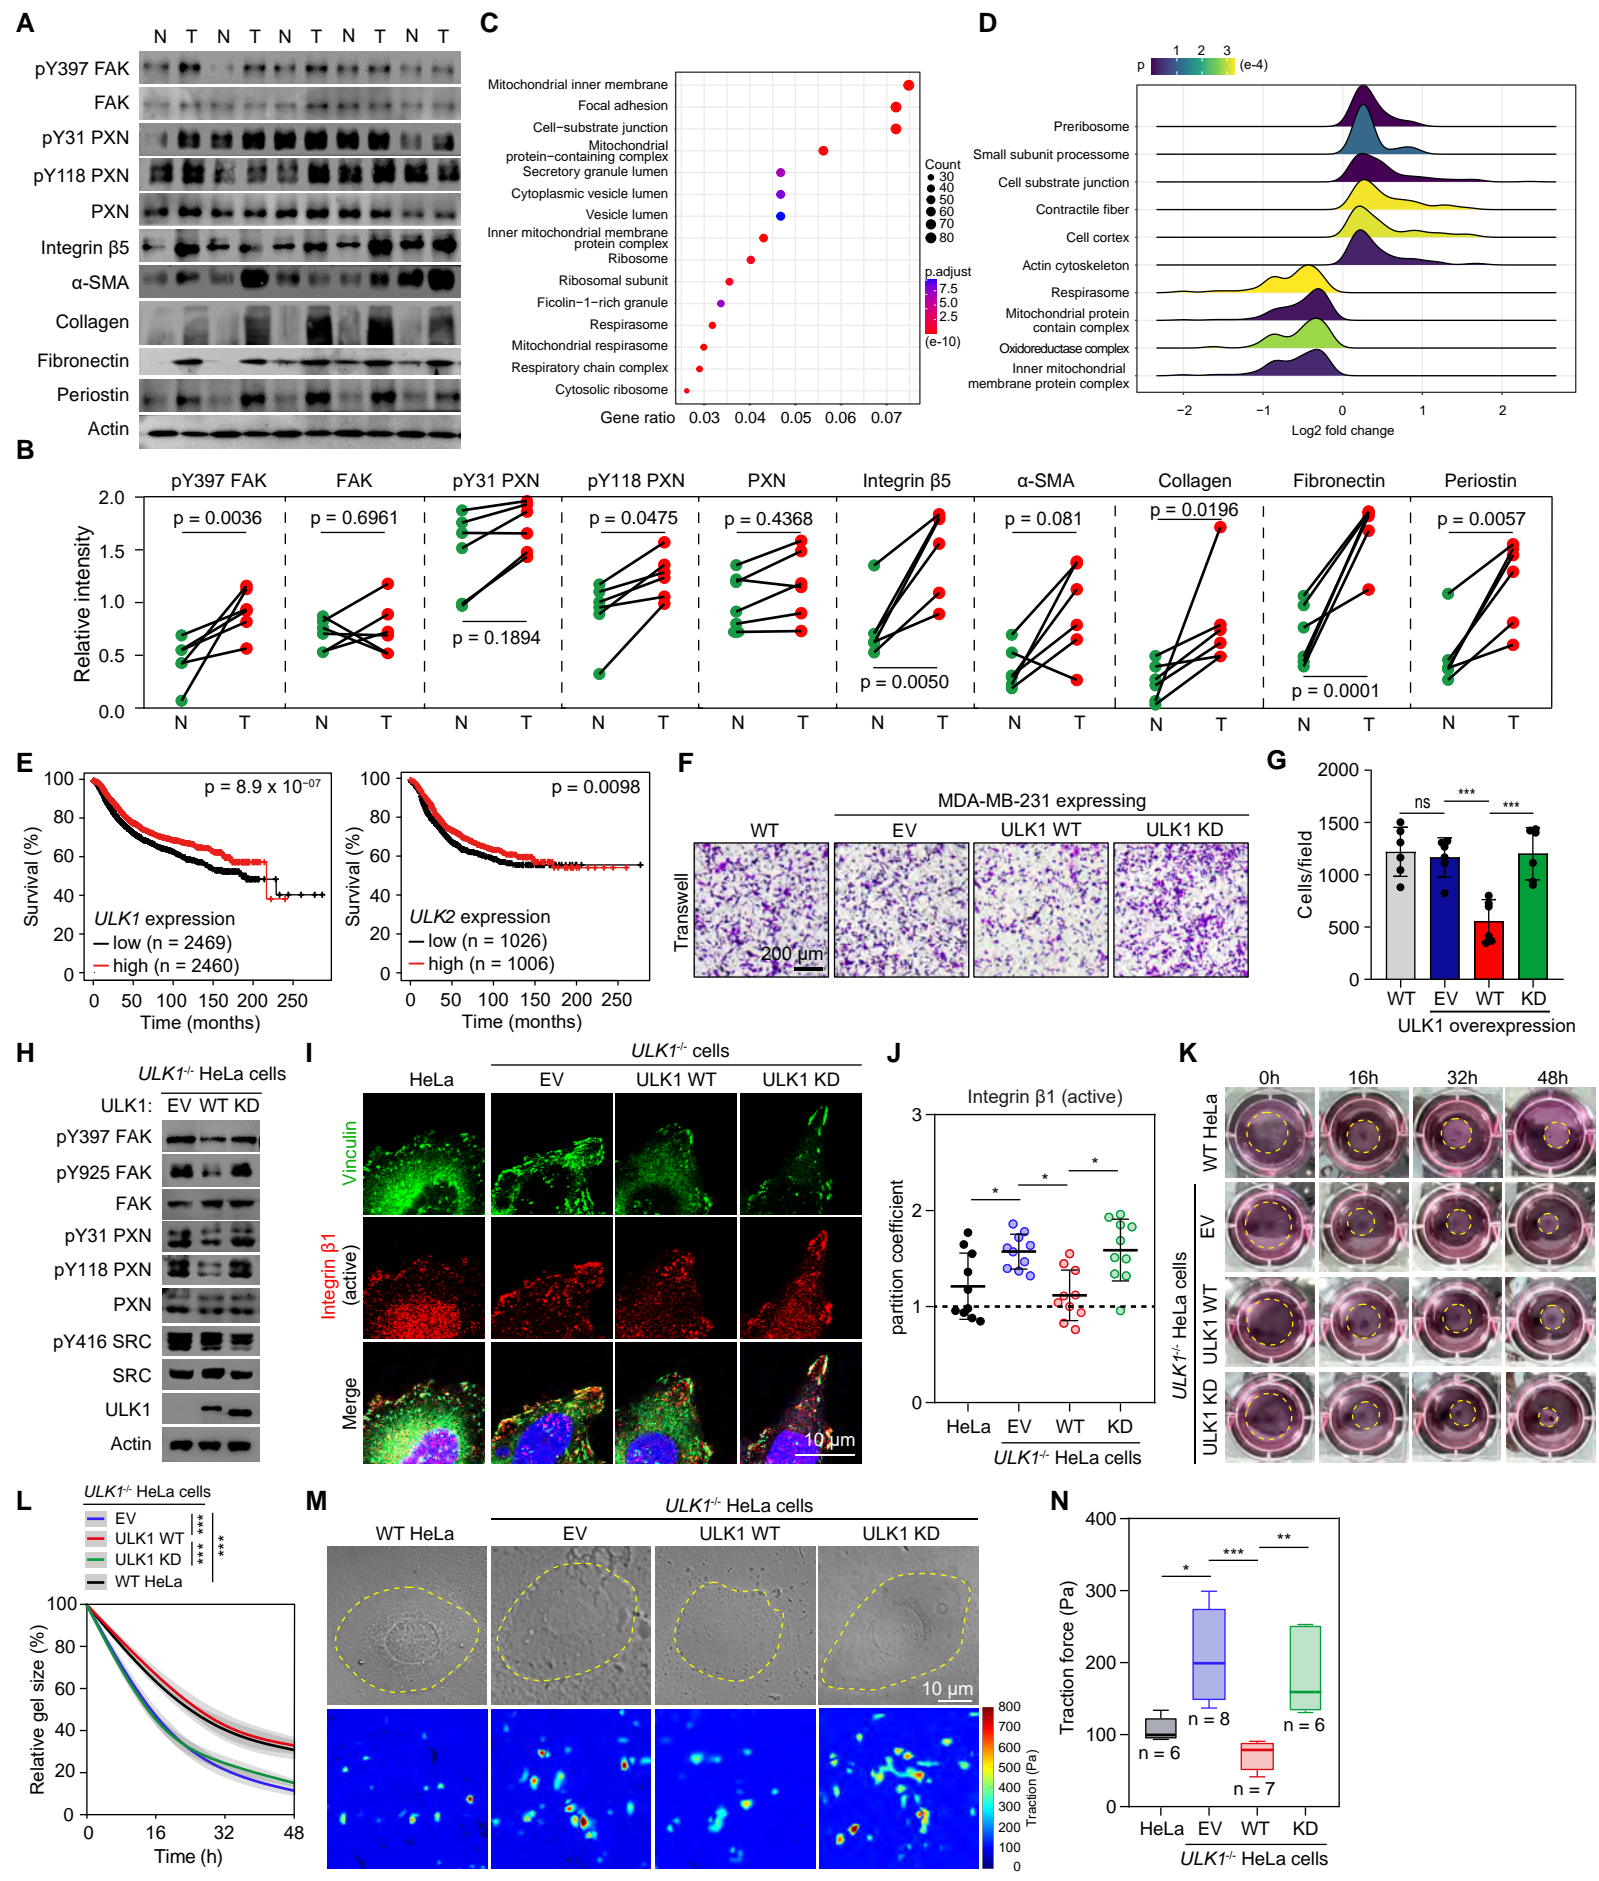

**Figure S1. Related to Figure 1**

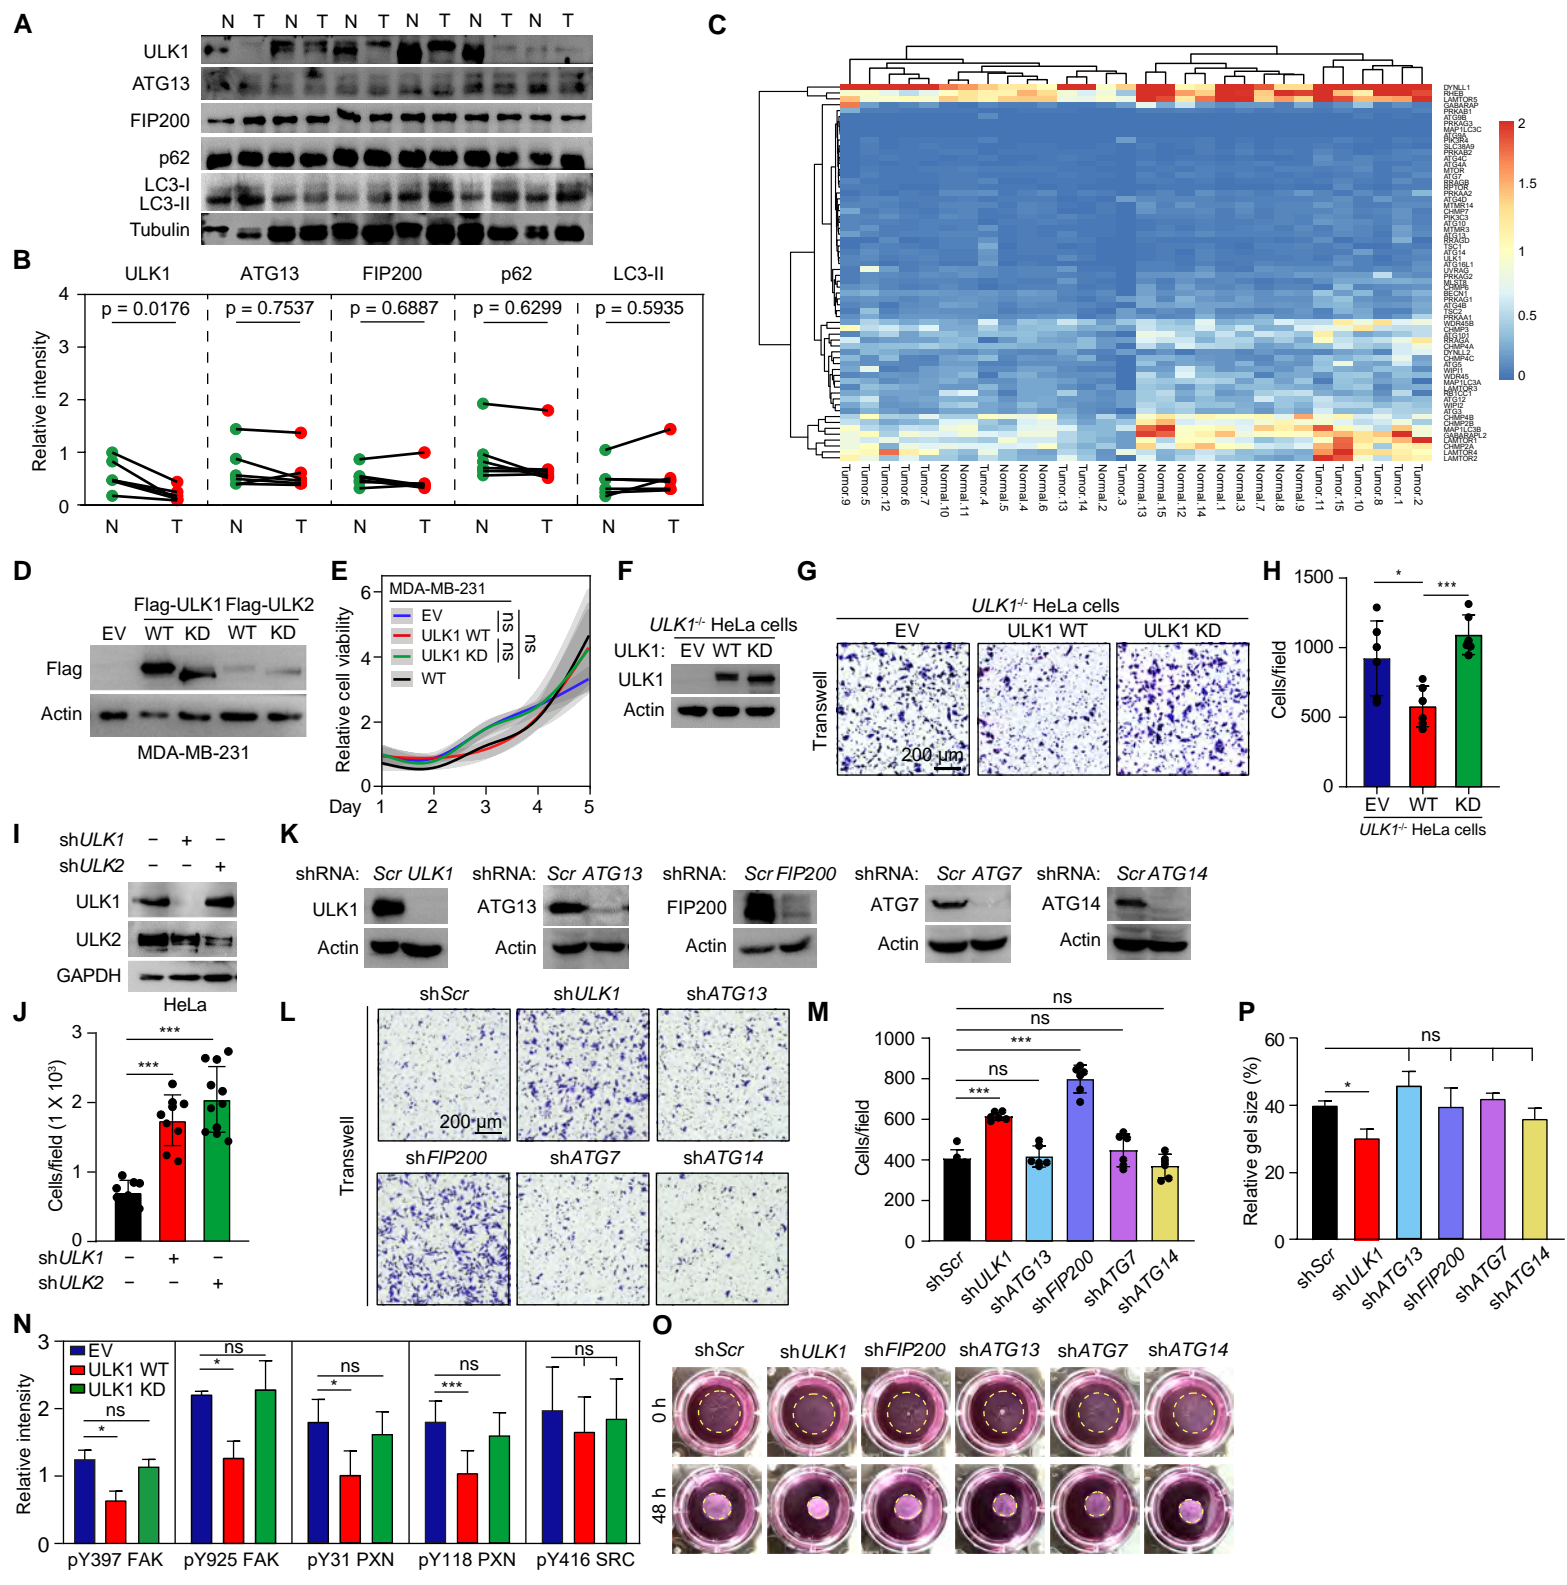

## Figure 2. ULK1/2 suppress stiffness-dependent cell spreading, actin reinforcement and FA assembly

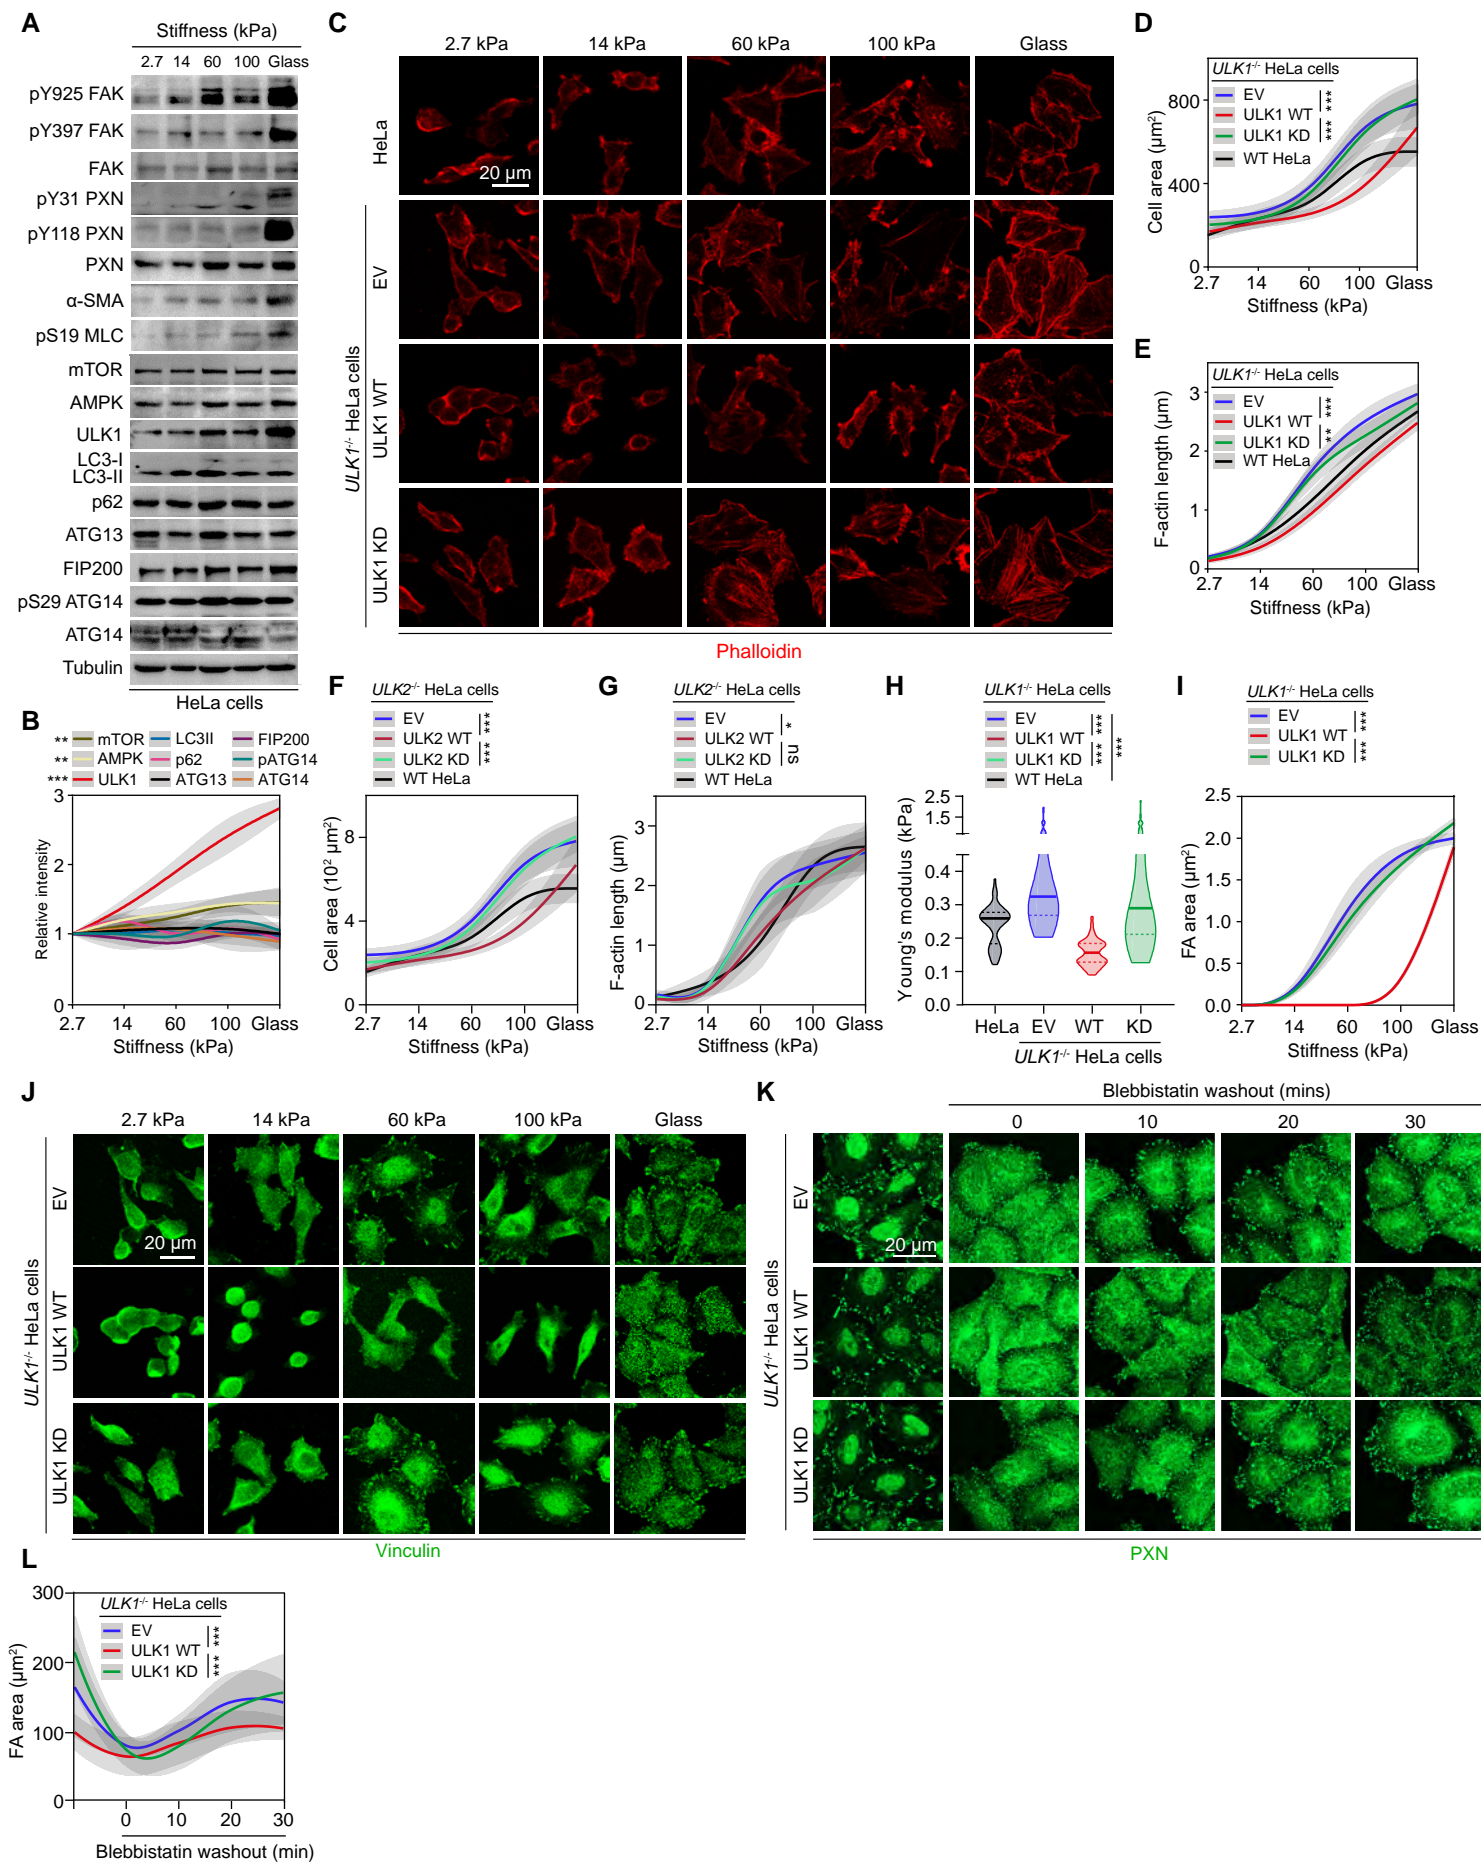



## Figure S2. Related to Figure 2

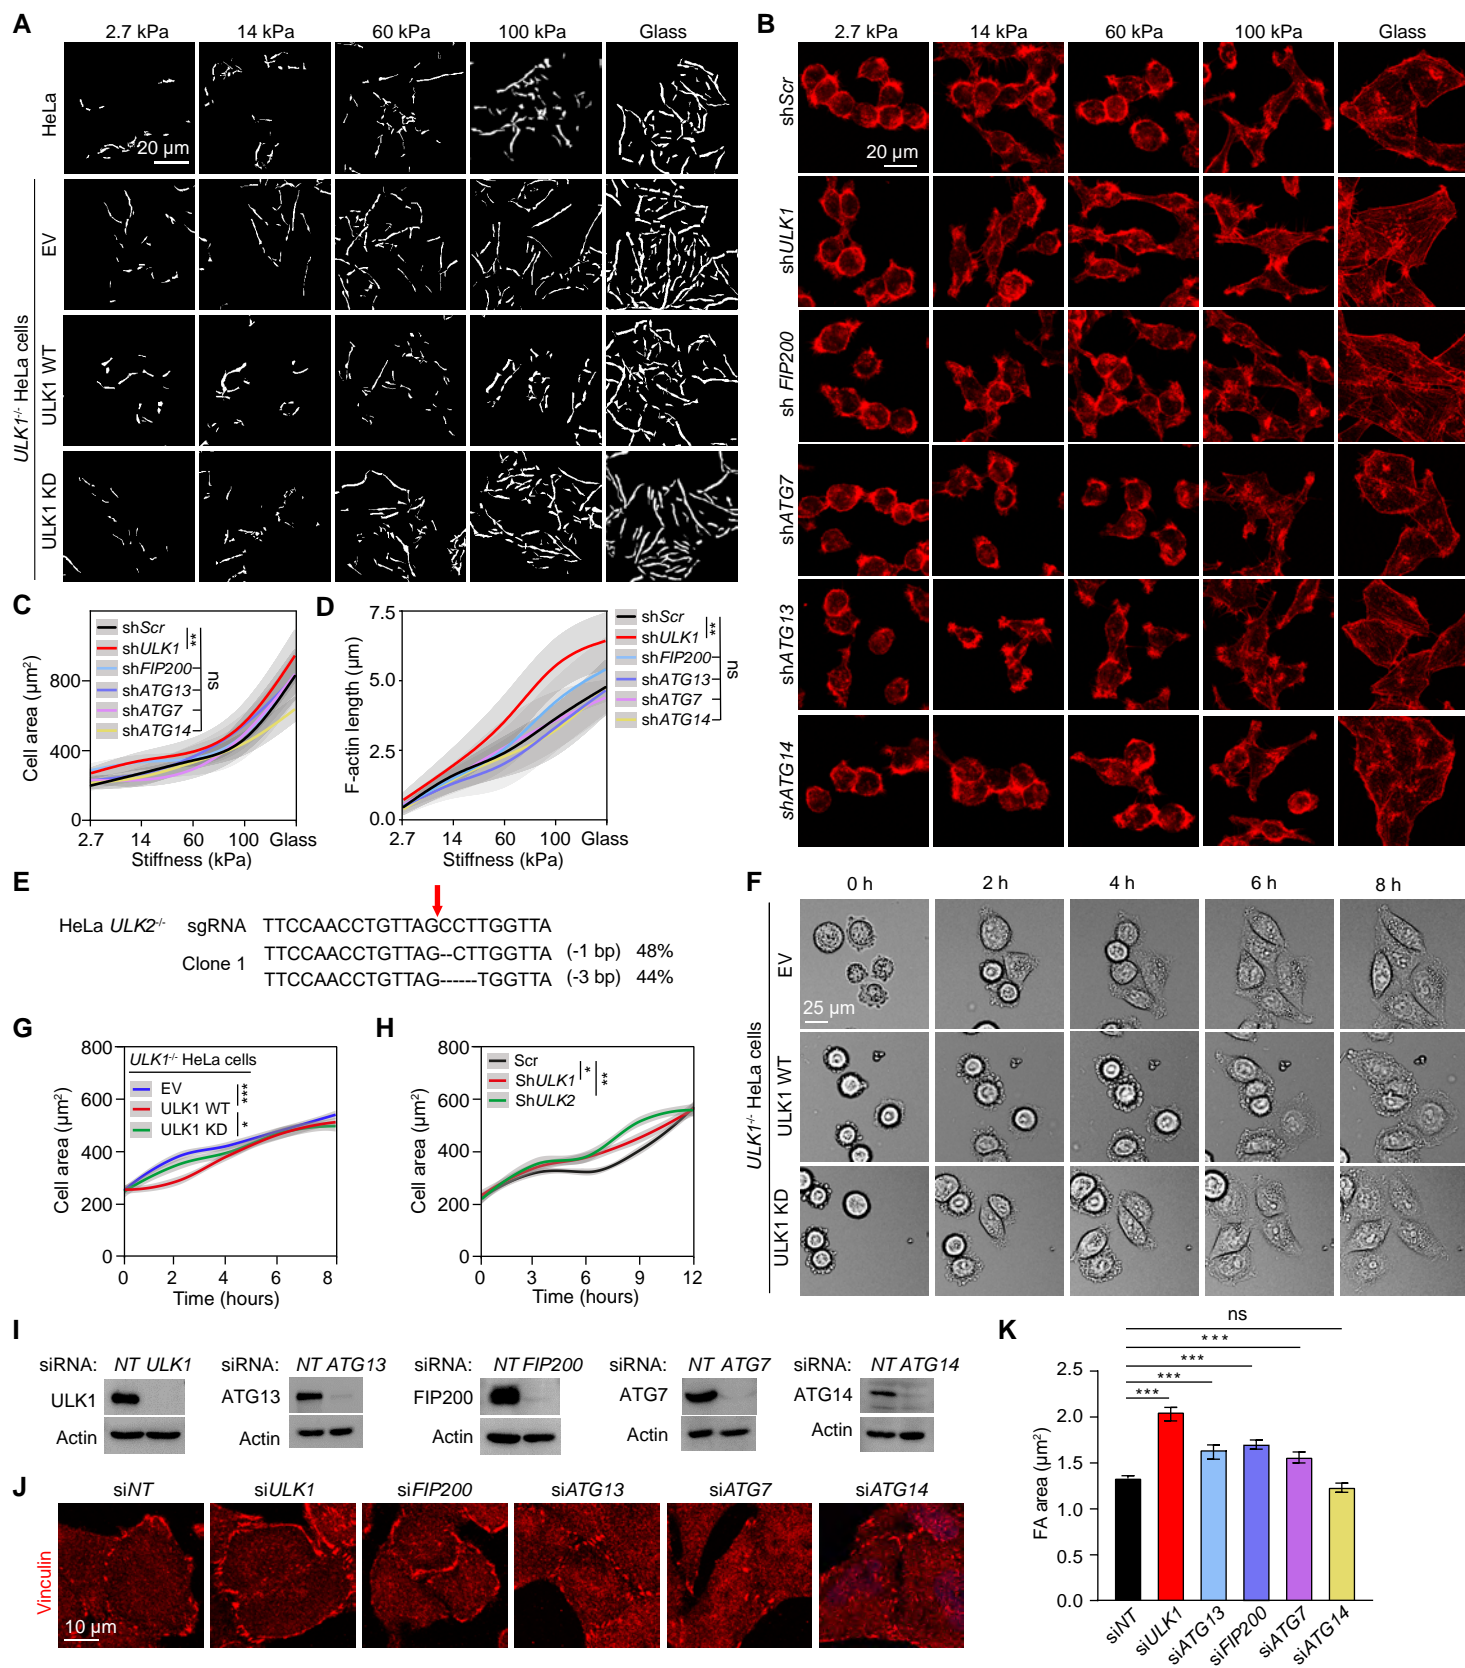

### Figure 3. ULK1/2 directly interact with and phosphorylate PXN

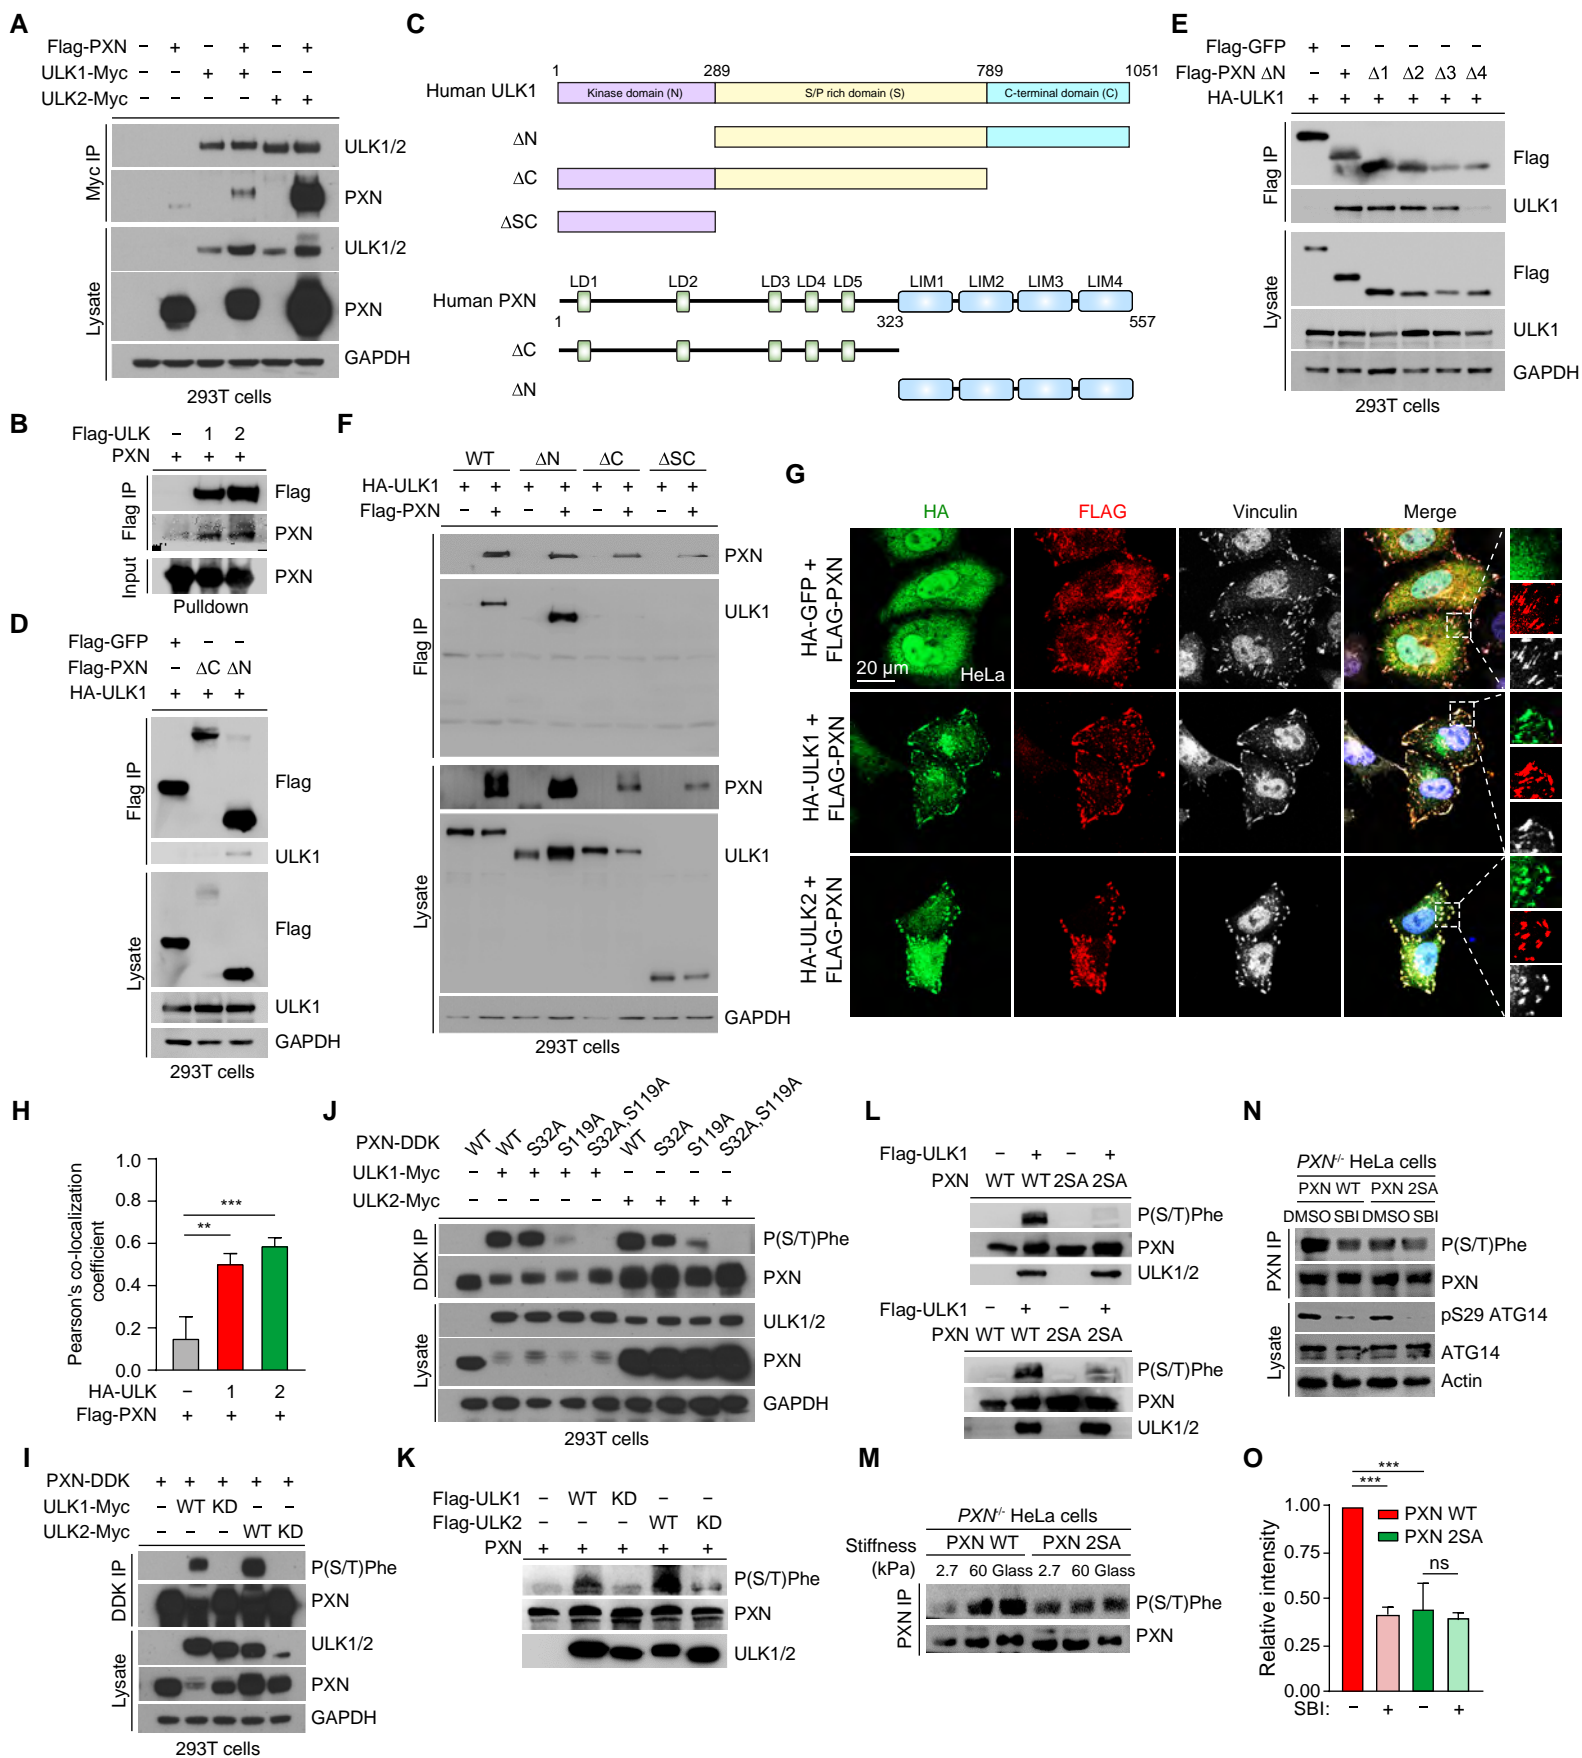

### Figure S3. Related to Figure 3

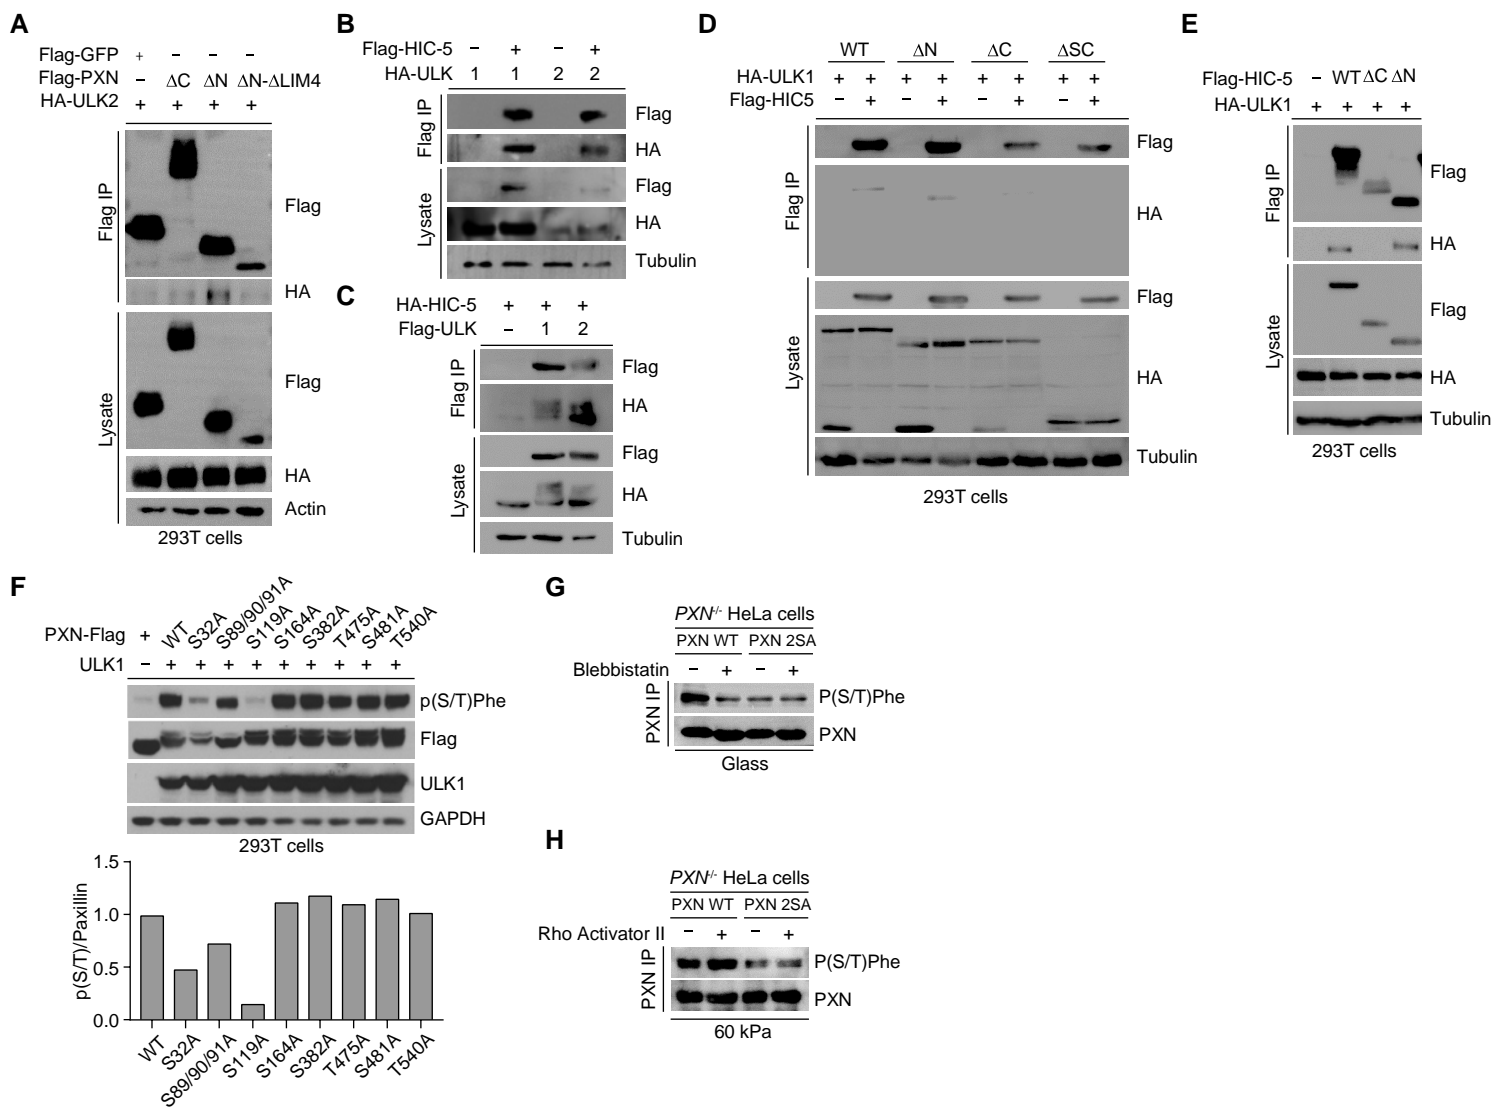



## Figure 4. ULK1/2-mediated phosphorylation of PXN inhibits breast cancer cell mechanics

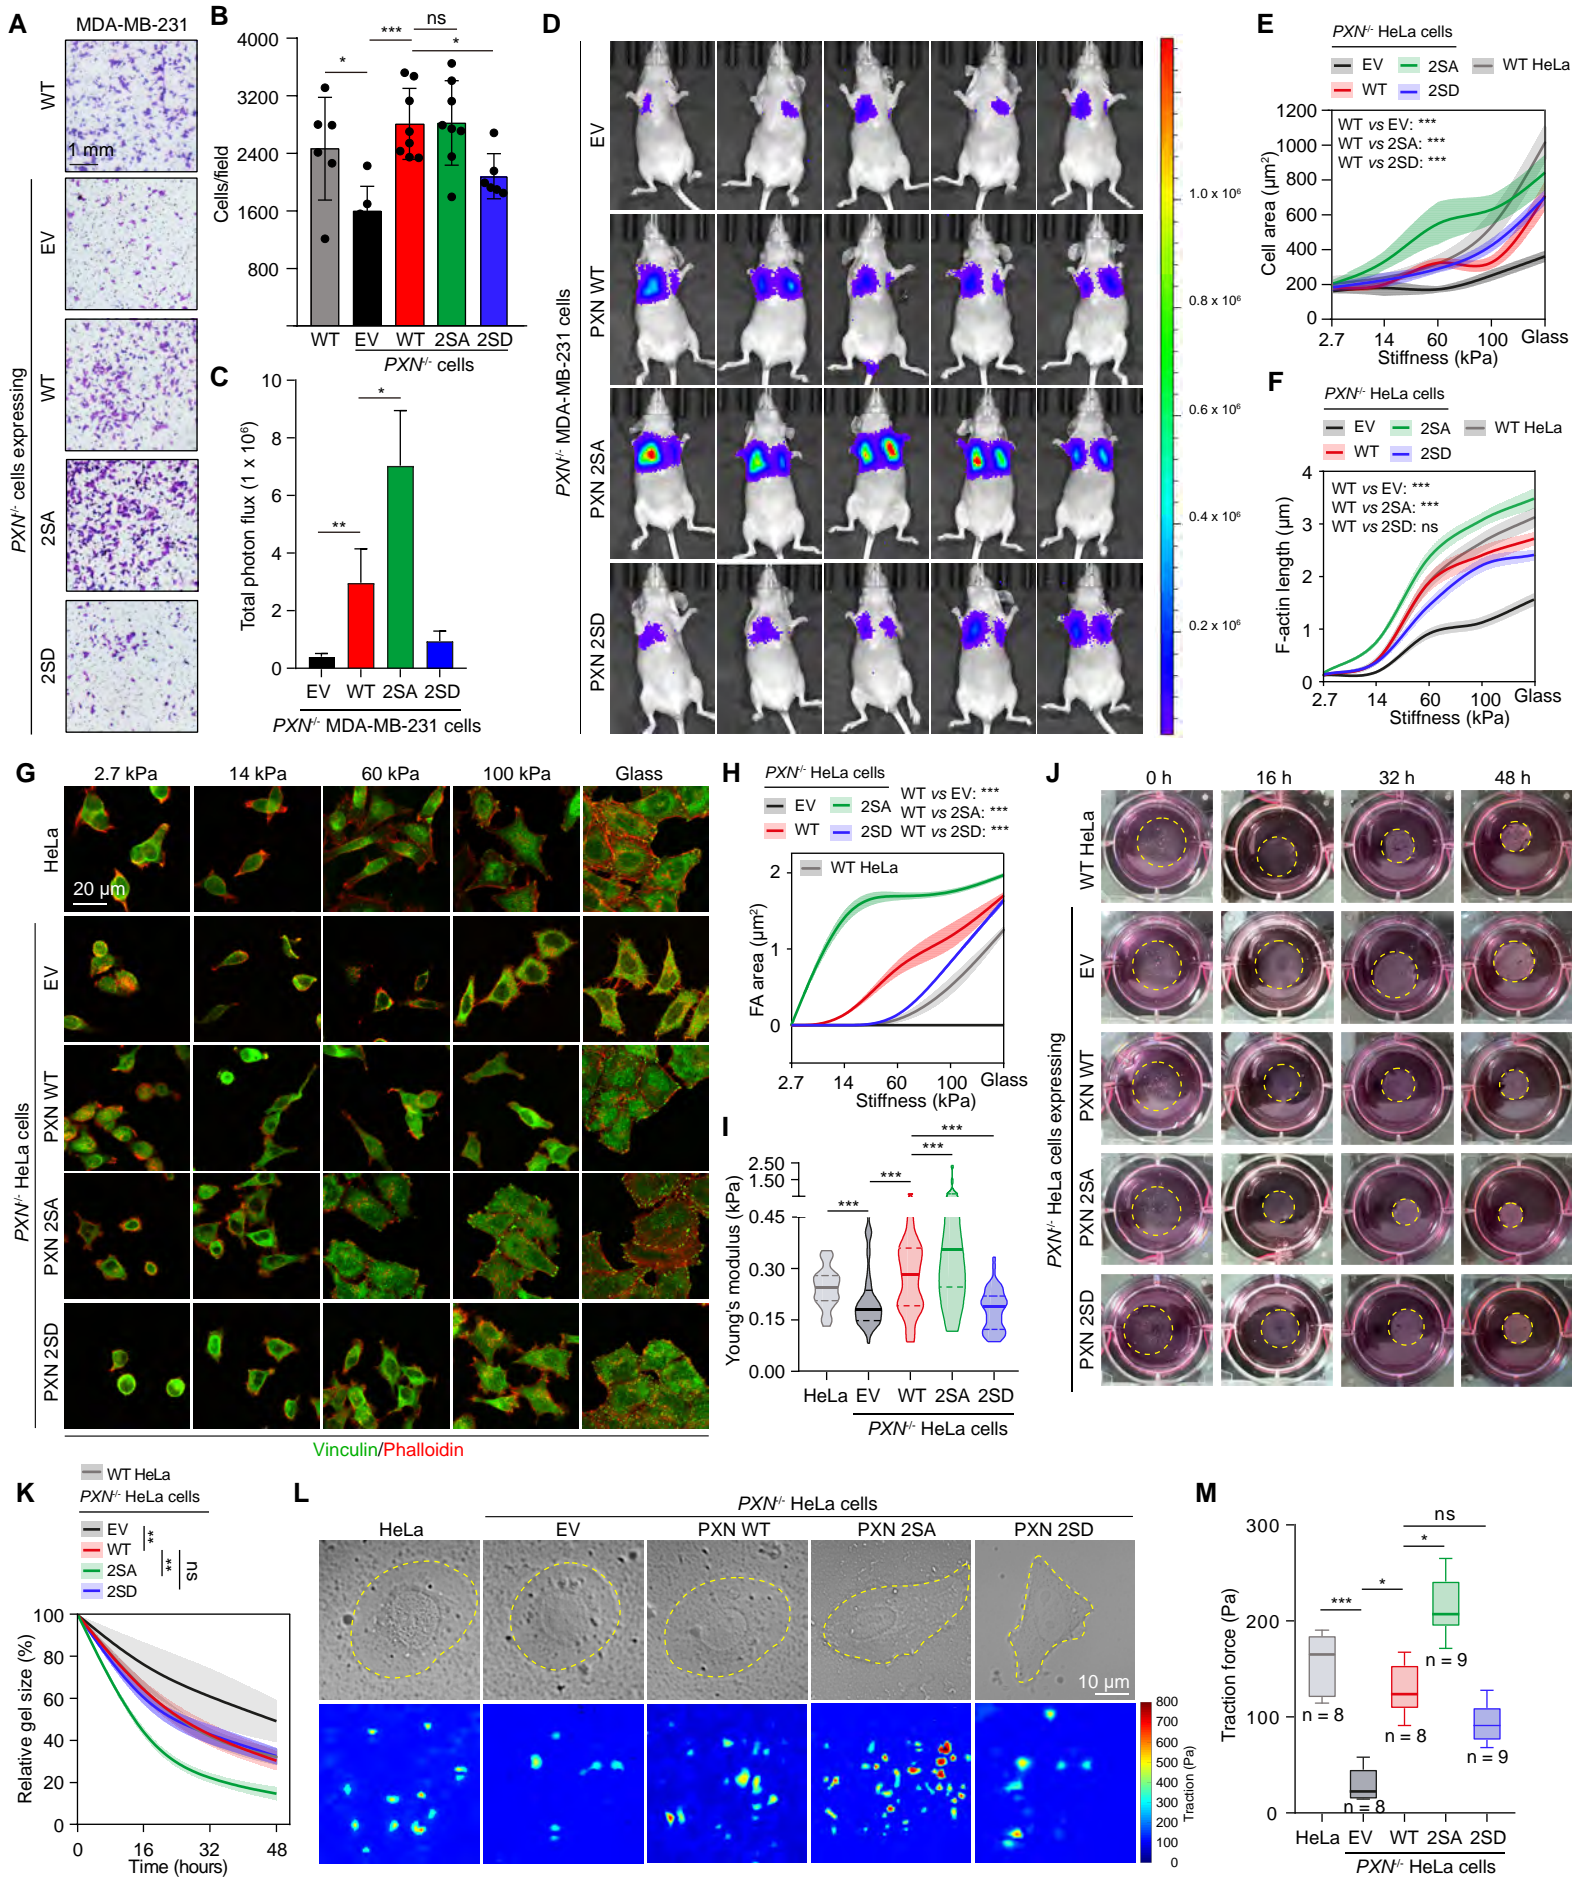

## Figure S4. Related to Figure 4

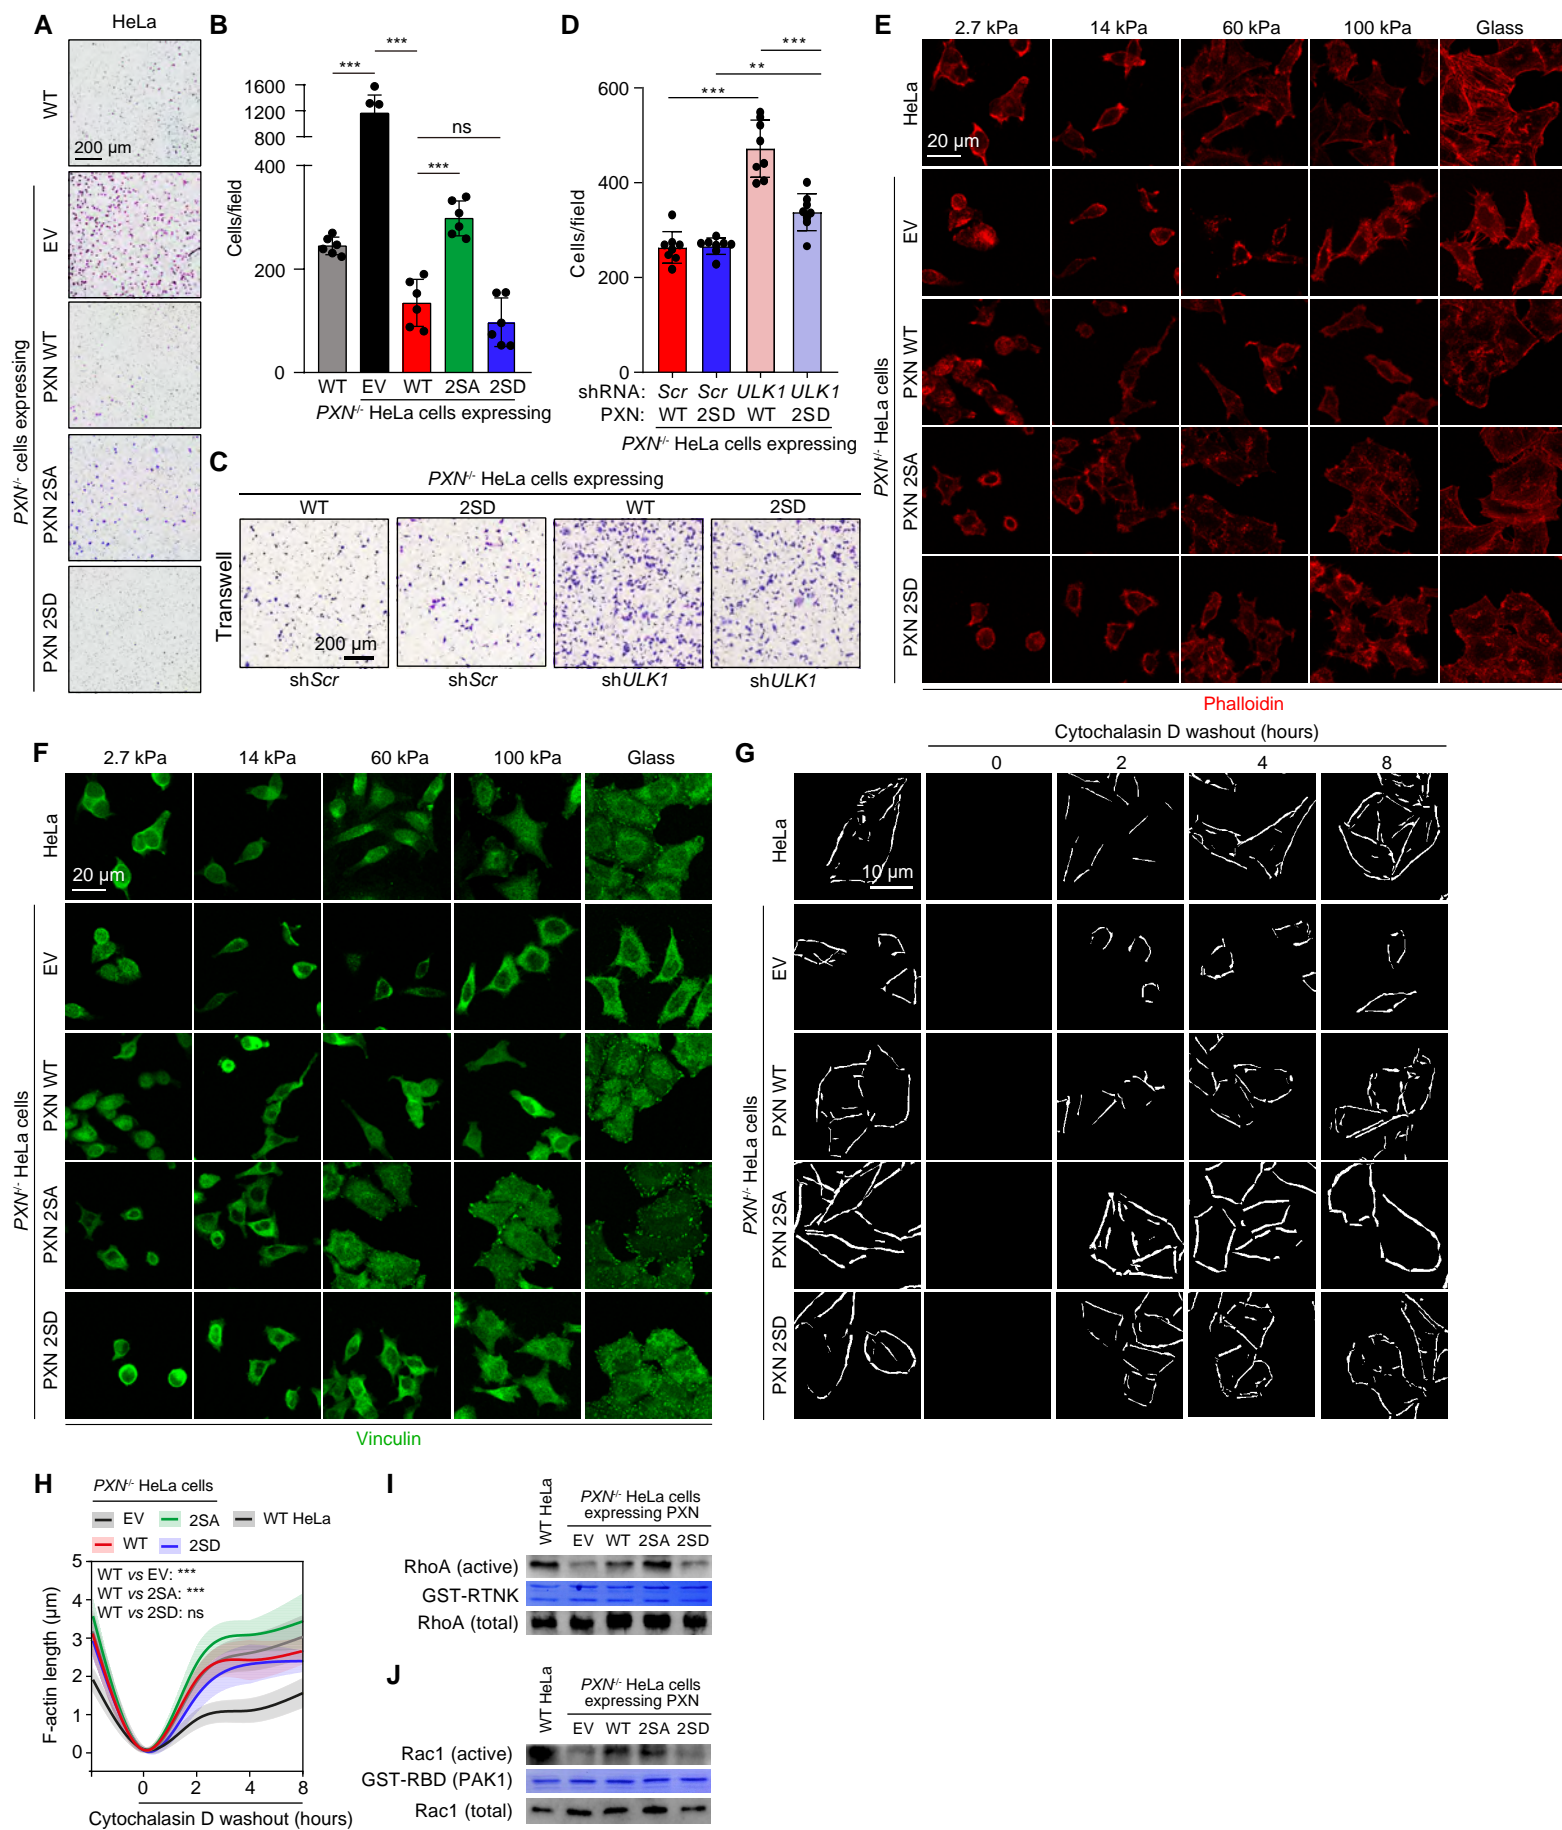



## Figure 5. Phosphorylation of PXN by ULK1/2 alters its biophysical properties

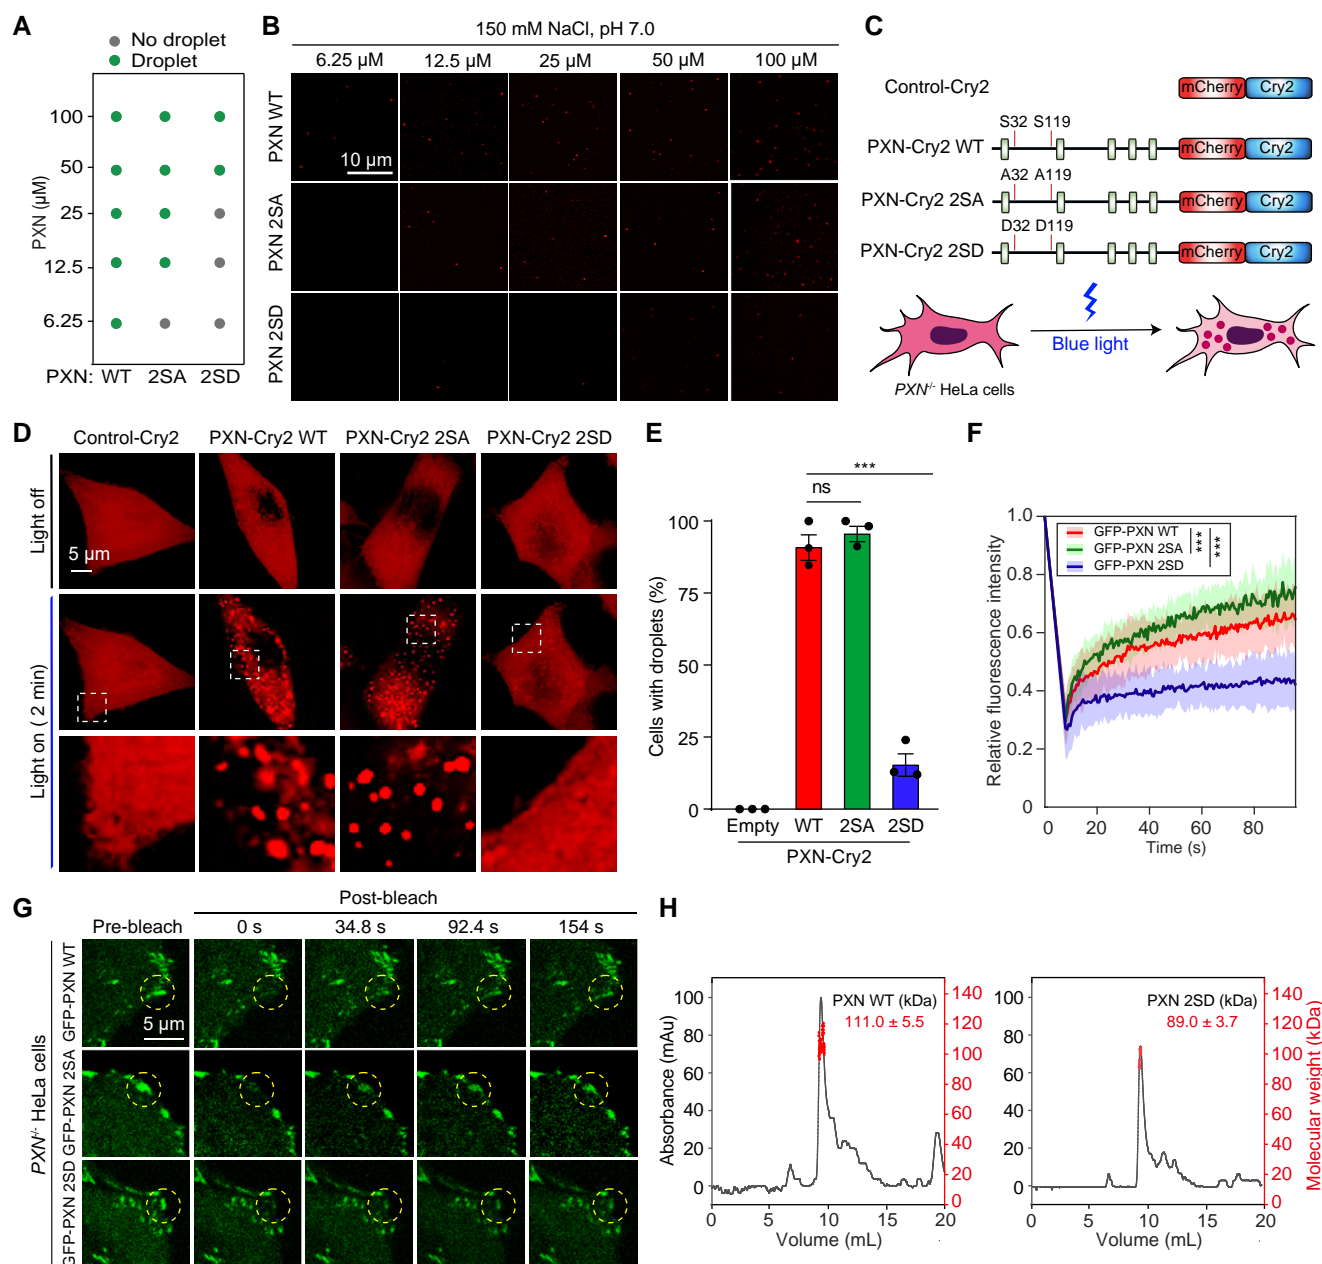

## Figure S5. Related to Figure 5

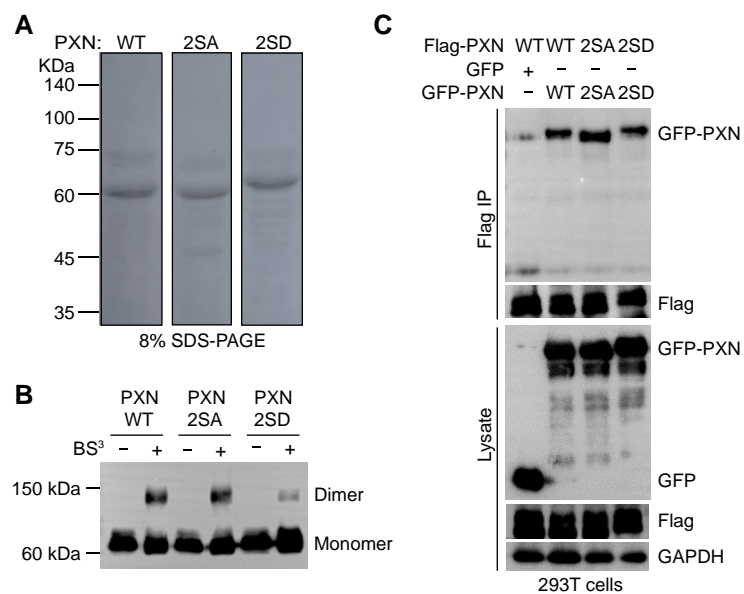



## Figure 6. ULK1/2 and FAK act antagonistically to regulate cell mechanotransduction

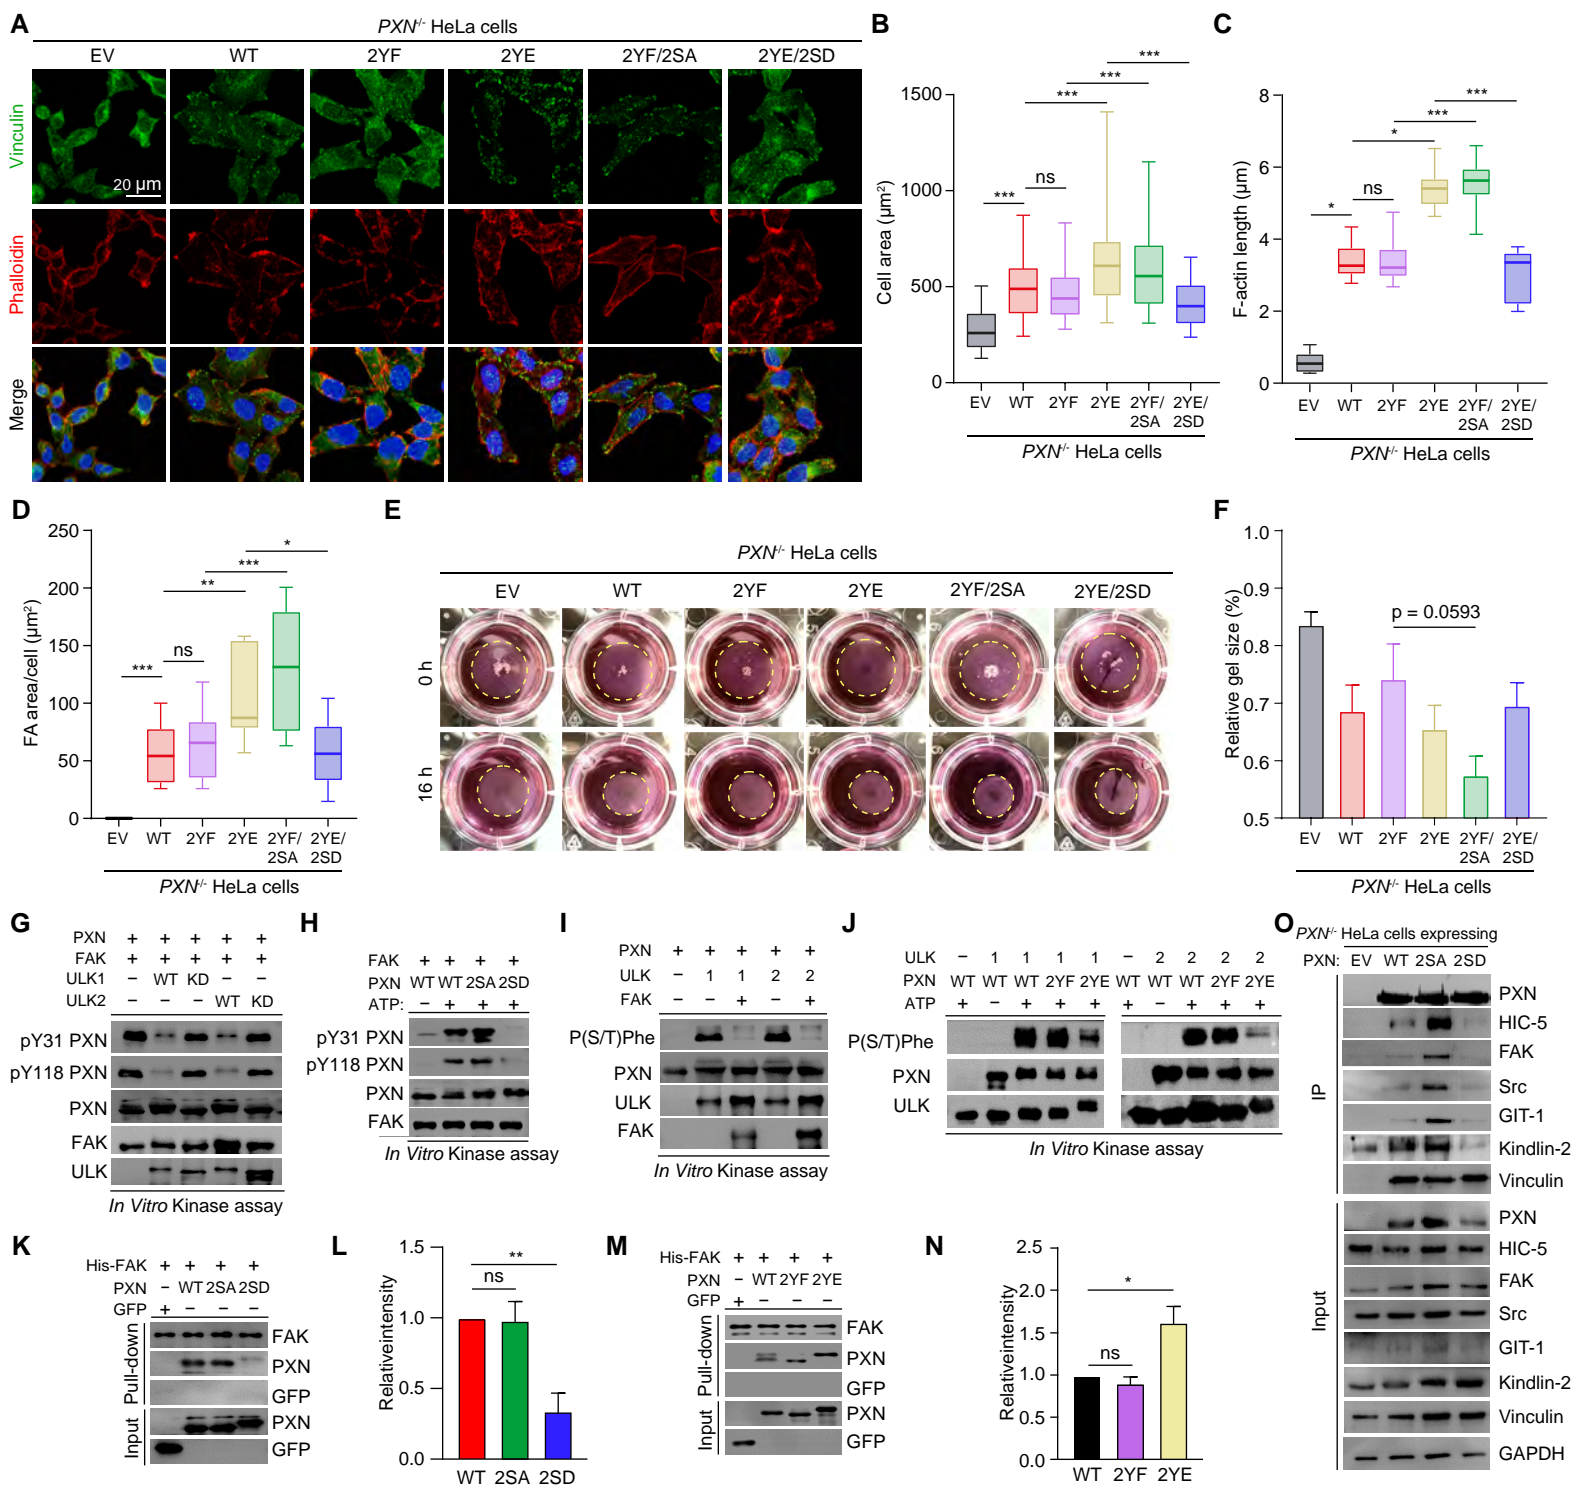

## Figure S6. Related to Figure 6

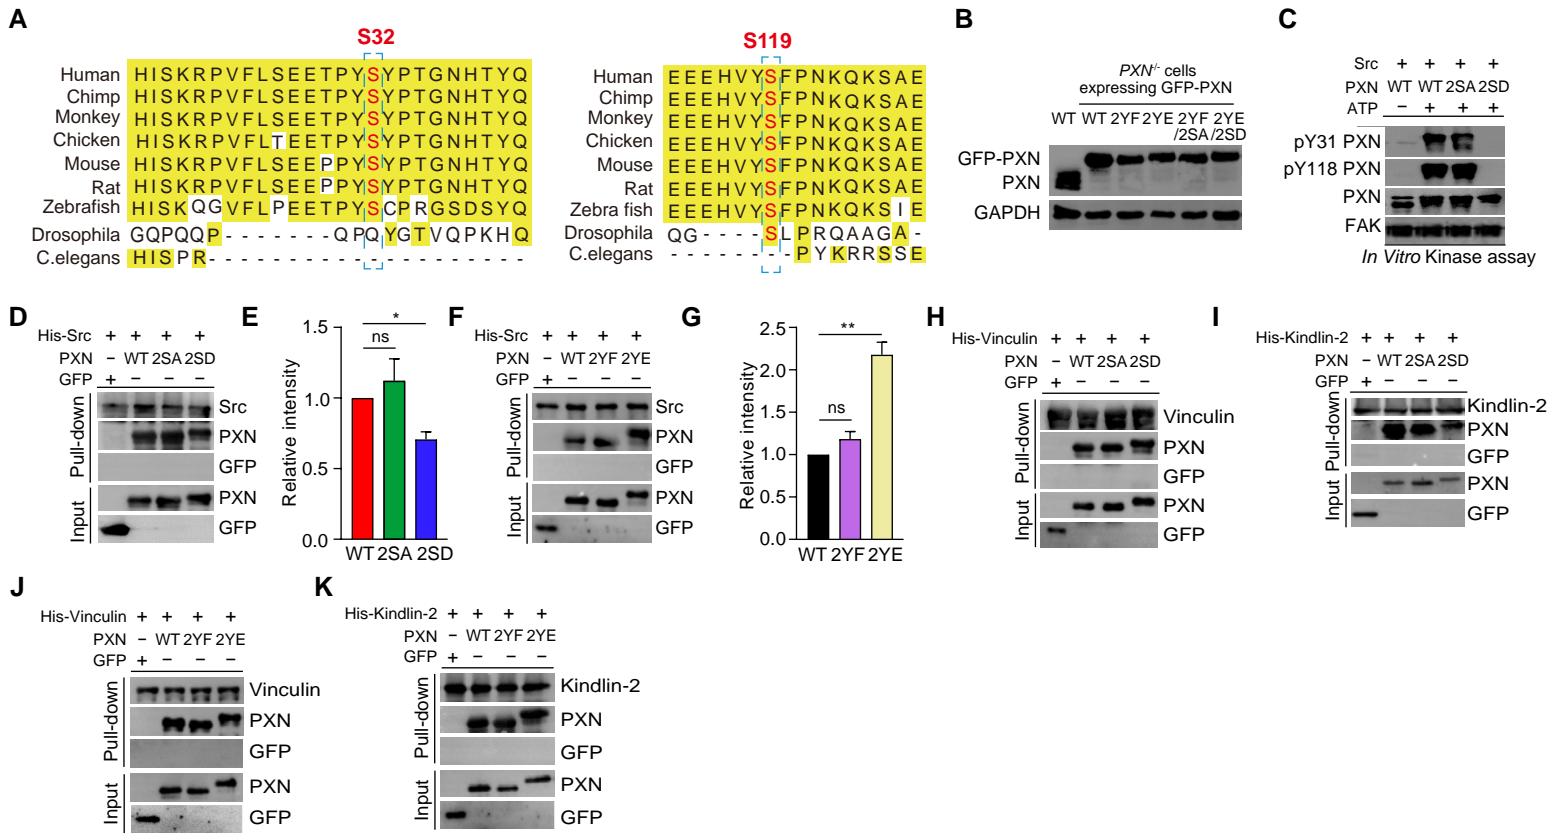

Source: https://www.biorxiv.org/content/10.1101/2023.02.03.526950.full.pdf
